# Supplementary material for: Eye Movements Index Implicit Memory Expression in Fear Conditioning
Source: PLoS One. 2015 Nov 12;10(11):e0141949. doi: 10.1371/journal.pone.0141949 (PMC4642991; doi:10.1371/journal.pone.0141949)
Supplement: S1 Data — (XLSX) [file pone.0141949.s001.xlsx]

## Sheet: UCS Expectancy
Subject	Trial Number	Trial CS	Dial Rating	PEQ Aware/Unaware
1	1	CS+	50	Aware
1	2	CS-	50	Aware
1	3	CS+	83.9868	Aware
1	4	CS+	54.9079	Aware
1	5	CS-	6	Aware
1	6	CS-	6	Aware
1	7	CS+	98	Aware
1	8	CS-	0.986842	Aware
1	9	CS+	95	Aware
1	10	CS-	3	Aware
1	11	CS+	98	Aware
1	12	CS-	6	Aware
1	13	CS+	96.3618	Aware
1	14	CS+	96	Aware
1	15	CS-	3	Aware
1	16	CS+	96	Aware
1	17	CS+	96	Aware
1	18	CS-	6	Aware
1	19	CS-	6	Aware
1	20	CS+	96	Aware
1	21	CS-	6	Aware
1	22	CS-	6	Aware
1	23	CS+	95	Aware
1	24	CS+	96	Aware
1	25	CS-	6	Aware
1	26	CS-	6	Aware
1	27	CS+	96	Aware
1	28	CS-	6	Aware
1	29	CS+	95.9803	Aware
1	30	CS-	3	Aware
1	31	CS+	96	Aware
1	32	CS-	3	Aware
2	1	CS-	50	Aware
2	2	CS+	50	Aware
2	3	CS-	11.9145	Aware
2	4	CS+	14.75	Aware
2	5	CS+	0	Aware
2	6	CS-	70.2434	Aware
2	7	CS-	95	Aware
2	8	CS+	50.6842	Aware
2	9	CS+	3	Aware
2	10	CS-	3	Aware
2	11	CS+	94.9803	Aware
2	12	CS+	81.3816	Aware
2	13	CS-	6	Aware
2	14	CS+	87.4803	Aware
2	15	CS-	0	Aware
2	16	CS-	15.8092	Aware
2	17	CS+	96	Aware
2	18	CS-	6	Aware
2	19	CS-	3	Aware
2	20	CS+	95.3224	Aware
2	21	CS-	0	Aware
2	22	CS+	96	Aware
2	23	CS-	0	Aware
2	24	CS+	95.9605	Aware
2	25	CS+	95	Aware
2	26	CS-	6	Aware
2	27	CS-	6	Aware
2	28	CS+	96	Aware
2	29	CS-	3	Aware
2	30	CS-	3	Aware
2	31	CS+	95	Aware
2	32	CS+	95.3553	Aware
3	1	CS+	50	Unaware
3	2	CS-	31	Unaware
3	3	CS+	12	Unaware
3	4	CS+	31	Unaware
3	5	CS-	53	Unaware
3	6	CS-	6	Unaware
3	7	CS+	6	Unaware
3	8	CS-	18	Unaware
3	9	CS+	65	Unaware
3	10	CS-	37	Unaware
3	11	CS+	36.0526	Unaware
3	12	CS-	65	Unaware
3	13	CS+	3	Unaware
3	14	CS+	3	Unaware
3	15	CS-	3	Unaware
3	16	CS+	3	Unaware
3	17	CS+	43	Unaware
3	18	CS-	37	Unaware
3	19	CS-	6	Unaware
3	20	CS+	18	Unaware
3	21	CS-	50	Unaware
3	22	CS-	54	Unaware
3	23	CS+	0	Unaware
3	24	CS+	38.8158	Unaware
3	25	CS-	52.4605	Unaware
3	26	CS-	22.375	Unaware
3	27	CS+	6	Unaware
3	28	CS-	50	Unaware
3	29	CS+	31	Unaware
3	30	CS-	51	Unaware
3	31	CS+	6	Unaware
3	32	CS-	51.4079	Unaware
4	1	CS+	54	Aware
4	2	CS-	54	Aware
4	3	CS+	54	Aware
4	4	CS-	57	Aware
4	5	CS-	57.8421	Aware
4	6	CS+	91.0592	Aware
4	7	CS+	51	Aware
4	8	CS-	6	Aware
4	9	CS-	1.86842	Aware
4	10	CS+	94.1184	Aware
4	11	CS-	6	Aware
4	12	CS-	3	Aware
4	13	CS+	96	Aware
4	14	CS-	3	Aware
4	15	CS+	95.9211	Aware
4	16	CS+	95.6053	Aware
4	17	CS-	3	Aware
4	18	CS+	95.6842	Aware
4	19	CS+	94.3092	Aware
4	20	CS-	3	Aware
4	21	CS+	81.0395	Aware
4	22	CS-	6	Aware
4	23	CS+	96	Aware
4	24	CS-	3	Aware
4	25	CS-	3	Aware
4	26	CS+	95	Aware
4	27	CS+	94.9408	Aware
4	28	CS-	3	Aware
4	29	CS+	96	Aware
4	30	CS+	93.0395	Aware
4	31	CS-	3	Aware
4	32	CS-	3	Aware
5	1	CS-	50	Aware
5	2	CS+	51	Aware
5	3	CS-	6	Aware
5	4	CS+	95	Aware
5	5	CS+	98	Aware
5	6	CS-	6	Aware
5	7	CS-	3	Aware
5	8	CS+	96	Aware
5	9	CS+	96	Aware
5	10	CS-	6	Aware
5	11	CS+	96	Aware
5	12	CS+	98	Aware
5	13	CS-	3	Aware
5	14	CS+	95	Aware
5	15	CS-	6	Aware
5	16	CS-	6	Aware
5	17	CS+	98	Aware
5	18	CS-	3	Aware
5	19	CS-	3	Aware
5	20	CS+	96	Aware
5	21	CS-	6	Aware
5	22	CS+	96	Aware
5	23	CS-	0	Aware
5	24	CS+	95.4539	Aware
5	25	CS+	96	Aware
5	26	CS-	3	Aware
5	27	CS-	3	Aware
5	28	CS+	96	Aware
5	29	CS-	3	Aware
5	30	CS-	3	Aware
5	31	CS+	97.4737	Aware
5	32	CS+	96	Aware
6	1	CS+	95	Unaware
6	2	CS-	3	Unaware
6	3	CS+	95	Unaware
6	4	CS-	0	Unaware
6	5	CS-	96	Unaware
6	6	CS+	96	Unaware
6	7	CS+	6	Unaware
6	8	CS-	95	Unaware
6	9	CS-	4.32895	Unaware
6	10	CS+	96	Unaware
6	11	CS-	97.6053	Unaware
6	12	CS-	95	Unaware
6	13	CS+	98	Unaware
6	14	CS-	95.7829	Unaware
6	15	CS+	96	Unaware
6	16	CS+	96	Unaware
6	17	CS-	3	Unaware
6	18	CS+	95.2895	Unaware
6	19	CS+	93.6382	Unaware
6	20	CS-	6	Unaware
6	21	CS+	96	Unaware
6	22	CS-	68.7632	Unaware
6	23	CS+	96	Unaware
6	24	CS-	0	Unaware
6	25	CS-	3	Unaware
6	26	CS+	94.4013	Unaware
6	27	CS+	96	Unaware
6	28	CS-	6	Unaware
6	29	CS+	96	Unaware
6	30	CS+	95	Unaware
6	31	CS-	0	Unaware
6	32	CS-	0	Unaware
7	1	CS-	50	Unaware
7	2	CS+	50	Unaware
7	3	CS-	53	Unaware
7	4	CS-	56	Unaware
7	5	CS+	59	Unaware
7	6	CS+	65.7303	Unaware
7	7	CS-	43.7829	Unaware
7	8	CS+	66.7434	Unaware
7	9	CS-	70	Unaware
7	10	CS+	56.7237	Unaware
7	11	CS-	73	Unaware
7	12	CS+	61	Unaware
7	13	CS-	61	Unaware
7	14	CS-	50	Unaware
7	15	CS+	63.3355	Unaware
7	16	CS-	31	Unaware
7	17	CS-	81	Unaware
7	18	CS+	78	Unaware
7	19	CS+	25.9474	Unaware
7	20	CS-	59	Unaware
7	21	CS+	68.3816	Unaware
7	22	CS+	3	Unaware
7	23	CS-	84.1974	Unaware
7	24	CS-	50	Unaware
7	25	CS+	52.5592	Unaware
7	26	CS+	61	Unaware
7	27	CS-	67	Unaware
7	28	CS+	37	Unaware
7	29	CS-	71	Unaware
7	30	CS+	78	Unaware
7	31	CS-	56	Unaware
7	32	CS+	64.7039	Unaware
8	1	CS+	50	Aware
8	2	CS-	50	Aware
8	3	CS+	94.2237	Aware
8	4	CS+	19.1513	Aware
8	5	CS-	3	Aware
8	6	CS-	78.3684	Aware
8	7	CS+	35.6908	Aware
8	8	CS-	34.5197	Aware
8	9	CS+	93.1316	Aware
8	10	CS-	75.3684	Aware
8	11	CS+	60.9211	Aware
8	12	CS-	9	Aware
8	13	CS+	90.1776	Aware
8	14	CS+	62	Aware
8	15	CS-	3	Aware
8	16	CS+	93.7039	Aware
8	17	CS+	3	Aware
8	18	CS-	24.9408	Aware
8	19	CS-	95	Aware
8	20	CS+	89.4605	Aware
8	21	CS-	6	Aware
8	22	CS-	85.75	Aware
8	23	CS+	94.9013	Aware
8	24	CS+	95	Aware
8	25	CS-	3	Aware
8	26	CS-	3	Aware
8	27	CS+	93.5658	Aware
8	28	CS-	0	Aware
8	29	CS+	89.3487	Aware
8	30	CS-	6	Aware
8	31	CS+	90.1776	Aware
8	32	CS-	3	Aware
9	1	CS+	50	Aware
9	2	CS-	50	Aware
9	3	CS+	50	Aware
9	4	CS+	50	Aware
9	5	CS-	50	Aware
9	6	CS-	50	Aware
9	7	CS+	93	Aware
9	8	CS-	51	Aware
9	9	CS+	51	Aware
9	10	CS-	6	Aware
9	11	CS+	17.8684	Aware
9	12	CS-	51	Aware
9	13	CS+	51	Aware
9	14	CS+	80.2632	Aware
9	15	CS-	94.3684	Aware
9	16	CS+	93	Aware
9	17	CS+	93	Aware
9	18	CS-	3	Aware
9	19	CS-	3	Aware
9	20	CS+	93	Aware
9	21	CS-	6	Aware
9	22	CS-	6	Aware
9	23	CS+	95	Aware
9	24	CS+	95	Aware
9	25	CS-	0	Aware
9	26	CS-	0	Aware
9	27	CS+	95	Aware
9	28	CS-	0	Aware
9	29	CS+	95	Aware
9	30	CS-	3	Aware
9	31	CS+	95	Aware
9	32	CS-	3	Aware
10	1	CS-	50	Aware
10	2	CS+	50	Aware
10	3	CS-	50	Aware
10	4	CS+	58.0329	Aware
10	5	CS+	65	Aware
10	6	CS-	9	Aware
10	7	CS-	21	Aware
10	8	CS+	95	Aware
10	9	CS+	95	Aware
10	10	CS-	0	Aware
10	11	CS+	93	Aware
10	12	CS+	93	Aware
10	13	CS-	3	Aware
10	14	CS+	93	Aware
10	15	CS-	3	Aware
10	16	CS-	3	Aware
10	17	CS+	70.0263	Aware
10	18	CS-	3	Aware
10	19	CS-	3	Aware
10	20	CS+	55.2566	Aware
10	21	CS-	0	Aware
10	22	CS+	64.2039	Aware
10	23	CS-	3	Aware
10	24	CS+	75.8553	Aware
10	25	CS+	79.0395	Aware
10	26	CS-	6	Aware
10	27	CS-	3	Aware
10	28	CS+	95	Aware
10	29	CS-	3	Aware
10	30	CS-	3	Aware
10	31	CS+	95	Aware
10	32	CS+	95	Aware
11	1	CS-	50	Unaware
11	2	CS+	50	Unaware
11	3	CS-	50	Unaware
11	4	CS-	58.0329	Unaware
11	5	CS+	65	Unaware
11	6	CS+	9	Unaware
11	7	CS-	21	Unaware
11	8	CS+	95	Unaware
11	9	CS-	95	Unaware
11	10	CS+	0	Unaware
11	11	CS-	93	Unaware
11	12	CS+	93	Unaware
11	13	CS-	3	Unaware
11	14	CS-	93	Unaware
11	15	CS+	3	Unaware
11	16	CS-	3	Unaware
11	17	CS-	70.0263	Unaware
11	18	CS+	3	Unaware
11	19	CS+	3	Unaware
11	20	CS-	55.2566	Unaware
11	21	CS+	0	Unaware
11	22	CS+	64.2039	Unaware
11	23	CS-	3	Unaware
11	24	CS-	75.8553	Unaware
11	25	CS+	79.0395	Unaware
11	26	CS+	6	Unaware
11	27	CS-	3	Unaware
11	28	CS+	95	Unaware
11	29	CS-	3	Unaware
11	30	CS+	3	Unaware
11	31	CS-	95	Unaware
11	32	CS+	95	Unaware
12	1	CS+	50	Aware
12	2	CS-	50	Aware
12	3	CS+	37.4737	Aware
12	4	CS-	57	Aware
12	5	CS-	57	Aware
12	6	CS+	57	Aware
12	7	CS+	54	Aware
12	8	CS-	54	Aware
12	9	CS-	57	Aware
12	10	CS+	53	Aware
12	11	CS-	16.2566	Aware
12	12	CS-	3	Aware
12	13	CS+	93	Aware
12	14	CS-	0	Aware
12	15	CS+	95	Aware
12	16	CS+	94.9276	Aware
12	17	CS-	3	Aware
12	18	CS+	94.1118	Aware
12	19	CS+	92.3158	Aware
12	20	CS-	6	Aware
12	21	CS+	92.9079	Aware
12	22	CS-	3	Aware
12	23	CS+	95	Aware
12	24	CS-	6	Aware
12	25	CS-	0	Aware
12	26	CS+	95	Aware
12	27	CS+	93.4934	Aware
12	28	CS-	6	Aware
12	29	CS+	95.0592	Aware
12	30	CS+	95	Aware
12	31	CS-	0	Aware
12	32	CS-	3	Aware
13	1	CS+	53	Aware
13	2	CS-	53	Aware
13	3	CS+	61.875	Aware
13	4	CS+	21.7829	Aware
13	5	CS-	0	Aware
13	6	CS-	94.8816	Aware
13	7	CS+	95.3816	Aware
13	8	CS-	0.519737	Aware
13	9	CS+	93.4145	Aware
13	10	CS-	3.48026	Aware
13	11	CS+	96	Aware
13	12	CS-	0	Aware
13	13	CS+	95	Aware
13	14	CS+	93.9474	Aware
13	15	CS-	3	Aware
13	16	CS+	94.3421	Aware
13	17	CS+	92.9605	Aware
13	18	CS-	14.2895	Aware
13	19	CS-	3	Aware
13	20	CS+	94.8816	Aware
13	21	CS-	4.90789	Aware
13	22	CS-	6	Aware
13	23	CS+	95	Aware
13	24	CS+	95	Aware
13	25	CS-	0	Aware
13	26	CS-	0	Aware
13	27	CS+	95	Aware
13	28	CS-	6	Aware
13	29	CS+	95	Aware
13	30	CS-	6	Aware
13	31	CS+	94.3158	Aware
13	32	CS-	3	Aware
14	1	CS-	50	Aware
14	2	CS+	50	Aware
14	3	CS-	9.375	Aware
14	4	CS+	91.1447	Aware
14	5	CS+	93.75	Aware
14	6	CS-	6	Aware
14	7	CS-	3	Aware
14	8	CS+	95	Aware
14	9	CS+	95	Aware
14	10	CS-	3	Aware
14	11	CS+	95	Aware
14	12	CS+	95	Aware
14	13	CS-	6	Aware
14	14	CS+	95	Aware
14	15	CS-	3	Aware
14	16	CS-	0	Aware
14	17	CS+	94.9605	Aware
14	18	CS-	3	Aware
14	19	CS-	0	Aware
14	20	CS+	62.1382	Aware
14	21	CS-	6	Aware
14	22	CS+	93.1316	Aware
14	23	CS-	0	Aware
14	24	CS+	96	Aware
14	25	CS+	95.9605	Aware
14	26	CS-	6	Aware
14	27	CS-	6	Aware
14	28	CS+	94.9605	Aware
14	29	CS-	0	Aware
14	30	CS-	3	Aware
14	31	CS+	93	Aware
14	32	CS+	95	Aware
15	1	CS+	50.2368	Unaware
15	2	CS-	85.4671	Unaware
15	3	CS+	94.625	Unaware
15	4	CS+	3	Unaware
15	5	CS-	96	Unaware
15	6	CS-	94.7368	Unaware
15	7	CS+	3	Unaware
15	8	CS-	92.9013	Unaware
15	9	CS+	93.8026	Unaware
15	10	CS-	94.1118	Unaware
15	11	CS+	96	Unaware
15	12	CS-	0	Unaware
15	13	CS+	95	Unaware
15	14	CS+	95.9803	Unaware
15	15	CS-	6	Unaware
15	16	CS+	95	Unaware
15	17	CS+	3.03947	Unaware
15	18	CS-	3.27632	Unaware
15	19	CS-	94.9803	Unaware
15	20	CS+	93.9145	Unaware
15	21	CS-	93.4211	Unaware
15	22	CS-	96	Unaware
15	23	CS+	95	Unaware
15	24	CS+	3	Unaware
15	25	CS-	96	Unaware
15	26	CS-	93	Unaware
15	27	CS+	83.3092	Unaware
15	28	CS-	34	Unaware
15	29	CS+	87.75	Unaware
15	30	CS-	95.8816	Unaware
15	31	CS+	31.7895	Unaware
15	32	CS-	18	Unaware
16	1	CS+	51	Unaware
16	2	CS-	61.8092	Unaware
16	3	CS+	53	Unaware
16	4	CS+	0	Unaware
16	5	CS-	0	Unaware
16	6	CS-	95.4079	Unaware
16	7	CS+	93	Unaware
16	8	CS-	96	Unaware
16	9	CS+	51	Unaware
16	10	CS-	95	Unaware
16	11	CS+	88.4079	Unaware
16	12	CS-	14.4868	Unaware
16	13	CS+	96	Unaware
16	14	CS+	95	Unaware
16	15	CS-	6	Unaware
16	16	CS+	0	Unaware
16	17	CS+	94.8224	Unaware
16	18	CS-	6	Unaware
16	19	CS-	95	Unaware
16	20	CS+	93.4868	Unaware
16	21	CS-	95.9803	Unaware
16	22	CS-	95	Unaware
16	23	CS+	95	Unaware
16	24	CS+	3	Unaware
16	25	CS-	3	Unaware
16	26	CS-	96	Unaware
16	27	CS+	91.4276	Unaware
16	28	CS-	95.3947	Unaware
16	29	CS+	93.8026	Unaware
16	30	CS-	6	Unaware
16	31	CS+	3	Unaware
16	32	CS-	96	Unaware
17	1	CS+	54	Unaware
17	2	CS-	3	Unaware
17	3	CS+	9.56579	Unaware
17	4	CS-	55.1382	Unaware
17	5	CS-	3	Unaware
17	6	CS+	6.53947	Unaware
17	7	CS+	0	Unaware
17	8	CS-	95	Unaware
17	9	CS-	96	Unaware
17	10	CS+	81.8487	Unaware
17	11	CS-	96	Unaware
17	12	CS-	96	Unaware
17	13	CS+	3	Unaware
17	14	CS-	95	Unaware
17	15	CS+	98	Unaware
17	16	CS+	3	Unaware
17	17	CS-	96	Unaware
17	18	CS+	3	Unaware
17	19	CS+	0	Unaware
17	20	CS-	96	Unaware
17	21	CS+	3	Unaware
17	22	CS-	98	Unaware
17	23	CS+	3	Unaware
17	24	CS-	95.2368	Unaware
17	25	CS-	95	Unaware
17	26	CS+	3	Unaware
17	27	CS+	3	Unaware
17	28	CS-	97.7632	Unaware
17	29	CS+	0	Unaware
17	30	CS+	3	Unaware
17	31	CS-	95	Unaware
17	32	CS-	92	Unaware
18	1	CS-	54	Unaware
18	2	CS+	54	Unaware
18	3	CS-	51	Unaware
18	4	CS+	41.625	Unaware
18	5	CS+	100	Unaware
18	6	CS-	0	Unaware
18	7	CS-	3	Unaware
18	8	CS+	100	Unaware
18	9	CS+	100	Unaware
18	10	CS-	6	Unaware
18	11	CS+	100	Unaware
18	12	CS+	100	Unaware
18	13	CS-	3	Unaware
18	14	CS+	100	Unaware
18	15	CS-	0	Unaware
18	16	CS-	3	Unaware
18	17	CS+	99.9605	Unaware
18	18	CS-	0	Unaware
18	19	CS-	3	Unaware
18	20	CS+	97.649	Unaware
18	21	CS-	3	Unaware
18	22	CS+	98	Unaware
18	23	CS-	0	Unaware
18	24	CS+	98	Unaware
18	25	CS+	98	Unaware
18	26	CS-	6	Unaware
18	27	CS-	6	Unaware
18	28	CS+	95.6382	Unaware
18	29	CS-	3	Unaware
18	30	CS-	3.82895	Unaware
18	31	CS+	95.6908	Unaware
18	32	CS+	100	Unaware
19	1	CS-	53	Unaware
19	2	CS+	53	Unaware
19	3	CS-	0	Unaware
19	4	CS-	100	Unaware
19	5	CS+	100	Unaware
19	6	CS+	0	Unaware
19	7	CS-	100	Unaware
19	8	CS+	3.07895	Unaware
19	9	CS-	5.63158	Unaware
19	10	CS+	3.07895	Unaware
19	11	CS-	0	Unaware
19	12	CS+	98	Unaware
19	13	CS-	6	Unaware
19	14	CS-	99.0789	Unaware
19	15	CS+	3	Unaware
19	16	CS-	0	Unaware
19	17	CS-	0	Unaware
19	18	CS+	97.9605	Unaware
19	19	CS+	95.7237	Unaware
19	20	CS-	6	Unaware
19	21	CS+	91.3092	Unaware
19	22	CS+	98	Unaware
19	23	CS-	3	Unaware
19	24	CS-	6	Unaware
19	25	CS+	98	Unaware
19	26	CS+	98	Unaware
19	27	CS-	3	Unaware
19	28	CS+	99.7632	Unaware
19	29	CS-	0.296053	Unaware
19	30	CS+	97	Unaware
19	31	CS-	3.27632	Unaware
19	32	CS+	100	Unaware
20	1	CS+	50	Aware
20	2	CS-	86.8684	Aware
20	3	CS+	65.6974	Aware
20	4	CS-	33.7697	Aware
20	5	CS-	100	Aware
20	6	CS+	99.9211	Aware
20	7	CS+	33.1711	Aware
20	8	CS-	6	Aware
20	9	CS-	97.8816	Aware
20	10	CS+	96.1316	Aware
20	11	CS-	3	Aware
20	12	CS-	56	Aware
20	13	CS+	100	Aware
20	14	CS-	6	Aware
20	15	CS+	96	Aware
20	16	CS+	100	Aware
20	17	CS-	0	Aware
20	18	CS+	100	Aware
20	19	CS+	97.6053	Aware
20	20	CS-	3	Aware
20	21	CS+	97.9211	Aware
20	22	CS-	3	Aware
20	23	CS+	98	Aware
20	24	CS-	3	Aware
20	25	CS-	3	Aware
20	26	CS+	98	Aware
20	27	CS+	100	Aware
20	28	CS-	0	Aware
20	29	CS+	98	Aware
20	30	CS+	99.9474	Aware
20	31	CS-	3	Aware
20	32	CS-	3	Aware

## Sheet: SCR
Subject	Trial Number	Trial CS	BL	Peak
1	1	CS+	10.623	12		KEY
1	2	CS-	10.818	11.442		BL = Baseline
1	3	CS+	11.201	12.109
1	4	CS+	9.836	10.172
1	5	CS-	9.785	9.908
1	6	CS-	9.697	9.671
1	7	CS+	9.107	10.099
1	8	CS-	9.334	9.222
1	9	CS+	8.41	8.355
1	10	CS-	9.442	9.216
1	11	CS+	8.16	7.919
1	12	CS-	9.058	8.748
1	13	CS+	8.926	10.069
1	14	CS+	11.321	11.063
1	15	CS-	10.487	10.299
1	16	CS+	9.812	9.537
1	17	CS+	9.589	9.158
1	18	CS-	8.209	7.97
1	19	CS-	6.866	6.641
1	20	CS+	5.68	5.501
1	21	CS-	5.077	4.939
1	22	CS-	4.428	4.315
1	23	CS+	3.963	3.933
1	24	CS+	5.791	5.672
1	25	CS-	5.255	5.158
1	26	CS-	4.876	4.758
1	27	CS+	4.255	4.149
1	28	CS-	5.506	5.385
1	29	CS+	4.629	4.489
1	30	CS-	4.534	4.399
1	31	CS+	4.694	4.588
1	32	CS-	4.289	4.214
2	1	CS-	15.078	15.818
2	2	CS+	15.248	15.061
2	3	CS-	16.214	15.978
2	4	CS+	15.064	15.205
2	5	CS+	14.694	16.442
2	6	CS-	15.153	15.868
2	7	CS-	14.83	15.215
2	8	CS+	15.123	15.068
2	9	CS+	14.482	14.968
2	10	CS-	14.967	14.705
2	11	CS+	14.314	15.232
2	12	CS+	15.12	15.211
2	13	CS-	15.18	14.901
2	14	CS+	14.306	15.843
2	15	CS-	14.916	15.411
2	16	CS-	14.527	14.543
2	17	CS+	14.436	14.818
2	18	CS-	14.634	15.009
2	19	CS-	13.546	13.952
2	20	CS+	13.709	14.123
2	21	CS-	14.234	13.931
2	22	CS+	14.957	14.853
2	23	CS-	13.223	12.999
2	24	CS+	14.924	15.618
2	25	CS+	14.343	14.894
2	26	CS-	14.532	14.29
2	27	CS-	13.22	12.965
2	28	CS+	12.062	12.261
2	29	CS-	13.12	12.91
2	30	CS-	12.14	12.308
2	31	CS+	16.904	17.272
2	32	CS+	16.969	16.971
3	1	CS+	10.561	11.354
3	2	CS-	11.775	12.615
3	3	CS+	11.458	12.139
3	4	CS+	10.987	11.819
3	5	CS-	10.992	11.361
3	6	CS-	10.547	11.187
3	7	CS+	10.369	10.633
3	8	CS-	10.227	10.406
3	9	CS+	10.254	10.394
3	10	CS-	9.69	10.152
3	11	CS+	10.236	10.28
3	12	CS-	10.252	10.223
3	13	CS+	9.761	10.266
3	14	CS+	9.76	10.114
3	15	CS-	9.734	10.194
3	16	CS+	9.61	9.908
3	17	CS+	9.461	9.413
3	18	CS-	9.462	9.554
3	19	CS-	9.692	9.82
3	20	CS+	9.766	9.835
3	21	CS-	9.748	10.232
3	22	CS-	9.597	9.581
3	23	CS+	9.854	9.722
3	24	CS+	11.553	10.958
3	25	CS-	11.363	11.014
3	26	CS-	10.295	10.193
3	27	CS+	10.177	10.001
3	28	CS-	9.851	9.683
3	29	CS+	9.562	9.444
3	30	CS-	9.926	9.7
3	31	CS+	9.159	9.07
3	32	CS-	9.453	9.276
4	1	CS+	25.077	26.36
4	2	CS-	26.077	26.693
4	3	CS+	25.827	26.11
4	4	CS-	25.162	26.244
4	5	CS-	25.015	26.261
4	6	CS+	25.144	26.117
4	7	CS+	24.973	25.33
4	8	CS-	24.597	25.306
4	9	CS-	24.238	24.655
4	10	CS+	23.747	24.842
4	11	CS-	24.557	24.309
4	12	CS-	24.223	24.255
4	13	CS+	23.777	23.999
4	14	CS-	23.769	23.609
4	15	CS+	23.753	24.139
4	16	CS+	23.845	23.751
4	17	CS-	23.454	23.847
4	18	CS+	23.05	23.078
4	19	CS+	23.288	23.268
4	20	CS-	23.264	23.118
4	21	CS+	23.132	22.927
4	22	CS-	23.126	22.929
4	23	CS+	22.256	21.851
4	24	CS-	21.856	21.702
4	25	CS-	21.078	20.927
4	26	CS+	19.958	19.738
4	27	CS+	19.287	19.13
4	28	CS-	19.988	19.747
4	29	CS+	18.658	18.569
4	30	CS+	18.137	18.02
4	31	CS-	17.891	17.711
4	32	CS-	16.968	16.844
5	1	CS-	16.291	16.451
5	2	CS+	15.789	16.49
5	3	CS-	16.085	15.88
5	4	CS+	14.984	14.979
5	5	CS+	14.386	14.314
5	6	CS-	13.8	13.965
5	7	CS-	13.777	13.735
5	8	CS+	13.199	13.468
5	9	CS+	13.474	13.4
5	10	CS-	12.873	12.876
5	11	CS+	13.098	13.038
5	12	CS+	14.1	13.923
5	13	CS-	14.924	14.774
5	14	CS+	14.283	14.116
5	15	CS-	13.931	13.811
5	16	CS-	16.024	15.578
5	17	CS+	14.766	14.625
5	18	CS-	14.078	13.917
5	19	CS-	14.431	14.631
5	20	CS+	15.966	15.694
5	21	CS-	16.374	16.102
5	22	CS+	16.365	16.104
5	23	CS-	15.446	16.105
5	24	CS+	15.957	15.918
5	25	CS+	15.529	15.471
5	26	CS-	14.694	14.537
5	27	CS-	15.699	15.854
5	28	CS+	15.13	14.989
5	29	CS-	15.791	15.553
5	30	CS-	15.437	15.219
5	31	CS+	17.344	16.96
5	32	CS+	16.238	16.462
6	1	CS+	20.92	21.241
6	2	CS-	21.743	21.865
6	3	CS+	20.97	20.642
6	4	CS-	20.292	20.507
6	5	CS-	19.65	19.733
6	6	CS+	19.597	19.615
6	7	CS+	19.692	19.814
6	8	CS-	20.892	20.601
6	9	CS-	19.305	19.101
6	10	CS+	18.842	18.899
6	11	CS-	20.018	19.642
6	12	CS-	18.666	18.846
6	13	CS+	18.864	18.637
6	14	CS-	18.347	18.39
6	15	CS+	18.543	18.624
6	16	CS+	18.568	18.702
6	17	CS-	18.456	18.469
6	18	CS+	18.523	18.234
6	19	CS+	18.067	18.018
6	20	CS-	18.31	18.167
6	21	CS+	17.764	17.906
6	22	CS-	18.449	18.607
6	23	CS+	18.224	18.199
6	24	CS-	19.738	19.434
6	25	CS-	18.803	18.461
6	26	CS+	17.977	17.865
6	27	CS+	17.84	17.74
6	28	CS-	17.614	18.242
6	29	CS+	17.461	17.396
6	30	CS+	17.819	17.665
6	31	CS-	17.326	17.29
6	32	CS-	17.038	17.017
7	1	CS-	9.603	9.619
7	2	CS+	9.427	9.367
7	3	CS-	9.396	9.458
7	4	CS-	8.964	9.24
7	5	CS+	8.568	8.911
7	6	CS+	9.762	9.422
7	7	CS-	8.746	8.662
7	8	CS+	8.135	8.151
7	9	CS-	8.238	8.111
7	10	CS+	7.825	8.23
7	11	CS-	7.868	7.753
7	12	CS+	8.226	8.015
7	13	CS-	8.772	8.367
7	14	CS-	8.041	7.914
7	15	CS+	7.565	7.524
7	16	CS-	8.106	7.933
7	17	CS-	7.778	7.709
7	18	CS+	8.734	8.493
7	19	CS+	8.758	8.474
7	20	CS-	8.419	9.227
7	21	CS+	8.309	8.194
7	22	CS+	8.033	7.934
7	23	CS-	7.548	7.468
7	24	CS-	7.151	7.16
7	25	CS+	6.907	6.851
7	26	CS+	7.089	6.989
7	27	CS-	7.305	7.104
7	28	CS+	6.714	6.652
7	29	CS-	6.798	6.734
7	30	CS+	6.822	6.69
7	31	CS-	6.925	6.833
7	32	CS+	6.476	6.429
8	1	CS+	17.642	18.48
8	2	CS-	18.497	19.266
8	3	CS+	17.008	17.728
8	4	CS+	16.182	16.714
8	5	CS-	15.692	15.667
8	6	CS-	15.624	16.204
8	7	CS+	15.269	15.683
8	8	CS-	14.982	15.545
8	9	CS+	15.089	15.284
8	10	CS-	15.291	16.164
8	11	CS+	15.666	15.742
8	12	CS-	15.661	16.059
8	13	CS+	15.579	16.208
8	14	CS+	15.602	16.049
8	15	CS-	15.99	15.926
8	16	CS+	16.523	16.314
8	17	CS+	15.928	16.404
8	18	CS-	15.916	15.747
8	19	CS-	15.55	15.538
8	20	CS+	15.583	15.529
8	21	CS-	15.972	16.024
8	22	CS-	15.765	15.756
8	23	CS+	15.56	15.584
8	24	CS+	16.23	16.03
8	25	CS-	16.337	16.149
8	26	CS-	16.042	15.929
8	27	CS+	16.009	15.981
8	28	CS-	16.671	16.409
8	29	CS+	15.831	15.725
8	30	CS-	16.561	16.289
8	31	CS+	15.483	15.369
8	32	CS-	15.467	15.295
9	1	CS+	20.361	21.278
9	2	CS-	20.146	19.745
9	3	CS+	18.646	21.354
9	4	CS+	19.811	19.835
9	5	CS-	19.551	20.208
9	6	CS-	18.323	17.883
9	7	CS+	21.852	20.801
9	8	CS-	19.395	20.521
9	9	CS+	17.24	19.014
9	10	CS-	18.442	18.709
9	11	CS+	17.628	17.75
9	12	CS-	17.319	17.618
9	13	CS+	16.485	16.486
9	14	CS+	16.191	16.044
9	15	CS-	16.528	15.554
9	16	CS+	19.515	20.497
9	17	CS+	18.625	19.33
9	18	CS-	18.675	19.035
9	19	CS-	17.578	18.096
9	20	CS+	16.866	16.8
9	21	CS-	17.053	16.761
9	22	CS-	15.902	15.968
9	23	CS+	17.053	17.84
9	24	CS+	17.711	17.664
9	25	CS-	17.484	17.297
9	26	CS-	16.762	16.719
9	27	CS+	18.025	17.287
9	28	CS-	16.306	16.515
9	29	CS+	16.113	16.285
9	30	CS-	17.193	16.893
9	31	CS+	16.178	16.032
9	32	CS-	16.253	15.839
10	1	CS-	17.166	18.075
10	2	CS+	17.517	17.84
10	3	CS-	17.064	17.775
10	4	CS+	17.719	18.66
10	5	CS+	17.468	17.799
10	6	CS-	16.633	17.145
10	7	CS-	16.209	16.053
10	8	CS+	15.83	16.35
10	9	CS+	16.382	16.361
10	10	CS-	17.048	16.73
10	11	CS+	16.538	16.598
10	12	CS+	16.728	17.166
10	13	CS-	17.102	17.089
10	14	CS+	17.156	17.437
10	15	CS-	17.151	17.902
10	16	CS-	17.442	17.415
10	17	CS+	17.077	17.243
10	18	CS-	19.25	19.106
10	19	CS-	18.196	18.373
10	20	CS+	18.197	18.47
10	21	CS-	18.441	18.21
10	22	CS+	17.718	17.848
10	23	CS-	18.982	18.278
10	24	CS+	17.928	18.34
10	25	CS+	18.144	18.706
10	26	CS-	18.788	19.143
10	27	CS-	18.422	18.584
10	28	CS+	18.846	19.557
10	29	CS-	19.211	19.517
10	30	CS-	18.683	18.605
10	31	CS+	18.286	18.58
10	32	CS+	18.23	18.258
11	1	CS-	8.713	8.8
11	2	CS+	8.752	8.816
11	3	CS-	8.853	8.905
11	4	CS-	8.814	9.114
11	5	CS+	9.08	9.28
11	6	CS+	9.008	9.062
11	7	CS-	8.75	8.717
11	8	CS+	8.741	8.874
11	9	CS-	8.705	8.823
11	10	CS+	8.413	8.45
11	11	CS-	8.433	8.576
11	12	CS+	8.391	8.53
11	13	CS-	8.375	8.506
11	14	CS-	8.394	8.384
11	15	CS+	8.164	8.264
11	16	CS-	8.412	8.438
11	17	CS-	8.392	8.334
11	18	CS+	8.418	8.356
11	19	CS+	8.18	8.163
11	20	CS-	8.091	8.076
11	21	CS+	7.992	8.032
11	22	CS+	8.054	8.029
11	23	CS-	7.78	7.727
11	24	CS-	7.511	7.479
11	25	CS+	7.341	7.311
11	26	CS+	7.248	7.197
11	27	CS-	7.052	7.038
11	28	CS+	6.899	6.858
11	29	CS-	6.753	6.757
11	30	CS+	6.586	6.553
11	31	CS-	6.702	6.626
11	32	CS+	6.367	6.362
12	1	CS+	8.699	9.09
12	2	CS-	10.353	10.92
12	3	CS+	10.493	10.648
12	4	CS-	10.167	10.285
12	5	CS-	9.772	9.779
12	6	CS+	9.749	9.716
12	7	CS+	9.767	9.676
12	8	CS-	9.891	9.972
12	9	CS-	9.753	9.946
12	10	CS+	9.862	9.828
12	11	CS-	10.624	10.513
12	12	CS-	10.448	10.306
12	13	CS+	10.399	10.406
12	14	CS-	11.068	11.121
12	15	CS+	10.64	10.801
12	16	CS+	10.736	10.864
12	17	CS-	11.388	11.335
12	18	CS+	10.475	10.432
12	19	CS+	10.078	10.039
12	20	CS-	9.826	9.93
12	21	CS+	9.777	9.597
12	22	CS-	10.065	9.991
12	23	CS+	9.6	9.576
12	24	CS-	9.696	9.636
12	25	CS-	9.424	9.255
12	26	CS+	8.861	8.764
12	27	CS+	8.878	8.744
12	28	CS-	8.642	8.543
12	29	CS+	8.818	8.684
12	30	CS+	8.889	9.033
12	31	CS-	9.23	9.223
12	32	CS-	8.838	8.756
13	1	CS+	24.196	26.127
13	2	CS-	33.441	32.813
13	3	CS+	26.653	26.159
13	4	CS+	26.161	26.204
13	5	CS-	22.63	24.187
13	6	CS-	21.19	22.664
13	7	CS+	19.722	20.985
13	8	CS-	18.856	20.374
13	9	CS+	19.259	21.57
13	10	CS-	25.006	25.453
13	11	CS+	21.874	22.511
13	12	CS-	21.473	21.005
13	13	CS+	19.397	22.113
13	14	CS+	22.62	23.443
13	15	CS-	20.083	20.901
13	16	CS+	20.399	20.852
13	17	CS+	19.274	20.966
13	18	CS-	21.106	23.023
13	19	CS-	21.439	21.904
13	20	CS+	20.764	21.236
13	21	CS-	20.7	22.762
13	22	CS-	20.713	21.585
13	23	CS+	20.404	21.95
13	24	CS+	21.969	22.996
13	25	CS-	21.405	22.556
13	26	CS-	20.24	20.48
13	27	CS+	20.134	20.739
13	28	CS-	21.344	21.944
13	29	CS+	22.435	22.364
13	30	CS-	21.513	20.953
13	31	CS+	21.533	21.609
13	32	CS-	20.45	20.801
14	1	CS-	14.722	14.736
14	2	CS+	14.249	14.838
14	3	CS-	18.552	20.204
14	4	CS+	17.116	18.543
14	5	CS+	15.123	15.534
14	6	CS-	13.881	13.806
14	7	CS-	13.54	13.556
14	8	CS+	13.683	14.123
14	9	CS+	12.65	12.576
14	10	CS-	12.759	12.892
14	11	CS+	12.529	13.029
14	12	CS+	13.012	13.241
14	13	CS-	13.123	13.066
14	14	CS+	13.044	13.407
14	15	CS-	13.294	13.237
14	16	CS-	12.875	12.758
14	17	CS+	12.045	11.85
14	18	CS-	12.846	12.587
14	19	CS-	11.345	11.15
14	20	CS+	10.032	9.81
14	21	CS-	10.515	10.621
14	22	CS+	9.832	9.654
14	23	CS-	9.903	9.758
14	24	CS+	9.045	8.899
14	25	CS+	12.475	12.241
14	26	CS-	14.985	14.776
14	27	CS-	13.83	13.573
14	28	CS+	12.661	12.545
14	29	CS-	14.149	13.71
14	30	CS-	12.288	11.955
14	31	CS+	10.329	10.185
14	32	CS+	10.871	10.595
15	1	CS+	29.196	30.817
15	2	CS-	33.333	33.803
15	3	CS+	32.207	33.034
15	4	CS+	33.695	32.03
15	5	CS-	29.89	31.33
15	6	CS-	31.18	32.171
15	7	CS+	31.936	33.092
15	8	CS-	35.467	35.656
15	9	CS+	34.141	34.752
15	10	CS-	33.088	34.399
15	11	CS+	31.346	32.835
15	12	CS-	31.525	32.219
15	13	CS+	31.034	31.911
15	14	CS+	31.769	33.418
15	15	CS-	32.589	32.513
15	16	CS+	31.472	31.849
15	17	CS+	31.669	31.166
15	18	CS-	30.55	31.225
15	19	CS-	30.997	32.12
15	20	CS+	30.143	31.441
15	21	CS-	31.052	31.901
15	22	CS-	30.829	31.922
15	23	CS+	30.218	31.635
15	24	CS+	30.736	31.583
15	25	CS-	30.707	31.434
15	26	CS-	30.915	31.827
15	27	CS+	30.503	30.591
15	28	CS-	30.564	30.904
15	29	CS+	29.594	29.873
15	30	CS-	28.985	28.851
15	31	CS+	28.317	29.14
15	32	CS-	27.73	27.733
16	1	CS+	21.717	22.19
16	2	CS-	22.711	22.317
16	3	CS+	22.323	22.631
16	4	CS+	21.581	21.582
16	5	CS-	20.299	20.267
16	6	CS-	20.551	20.392
16	7	CS+	19.784	19.691
16	8	CS-	18.953	19.579
16	9	CS+	18.876	19.054
16	10	CS-	19.156	19.082
16	11	CS+	18.108	18.339
16	12	CS-	18.795	18.898
16	13	CS+	18.518	18.621
16	14	CS+	19.018	18.992
16	15	CS-	18.071	18.173
16	16	CS+	18.043	18.268
16	17	CS+	18.054	17.982
16	18	CS-	18.133	17.917
16	19	CS-	17.101	17.277
16	20	CS+	17.005	16.716
16	21	CS-	16.676	16.586
16	22	CS-	16.2	16.544
16	23	CS+	16.149	16.282
16	24	CS+	15.894	16.071
16	25	CS-	15.575	15.84
16	26	CS-	15.874	15.981
16	27	CS+	15.53	15.449
16	28	CS-	16.705	16.676
16	29	CS+	16.475	16.161
16	30	CS-	16.32	16.559
16	31	CS+	16.487	17.091
16	32	CS-	17.298	17.654
17	1	CS+	8.106	8.64
17	2	CS-	8.173	8.682
17	3	CS+	8.261	8.807
17	4	CS-	7.867	8.16
17	5	CS-	8.042	7.85
17	6	CS+	7.722	8.029
17	7	CS+	8.005	7.932
17	8	CS-	7.461	7.98
17	9	CS-	7.382	7.667
17	10	CS+	7.117	7.573
17	11	CS-	7.66	7.787
17	12	CS-	7.091	7.039
17	13	CS+	6.778	6.957
17	14	CS-	6.572	6.47
17	15	CS+	6.094	6.185
17	16	CS+	6.021	6.015
17	17	CS-	5.694	5.852
17	18	CS+	5.411	5.496
17	19	CS+	5.584	5.484
17	20	CS-	5.062	4.986
17	21	CS+	4.571	4.485
17	22	CS-	4.479	4.371
17	23	CS+	3.943	3.883
17	24	CS-	3.764	3.688
17	25	CS-	3.482	3.458
17	26	CS+	3.208	3.152
17	27	CS+	2.946	2.932
17	28	CS-	3.073	3.034
17	29	CS+	2.754	2.746
17	30	CS+	2.812	2.757
17	31	CS-	2.579	2.561
17	32	CS-	2.501	2.463
18	1	CS-	18.101	20.289
18	2	CS+	17.322	18.397
18	3	CS-	17.908	18.274
18	4	CS+	18.124	19.83
18	5	CS+	15.619	15.34
18	6	CS-	15.142	14.801
18	7	CS-	13.644	13.787
18	8	CS+	14.141	15.645
18	9	CS+	16.208	15.201
18	10	CS-	13.856	13.422
18	11	CS+	12.746	12.771
18	12	CS+	13.307	13.736
18	13	CS-	14.198	13.532
18	14	CS+	12.286	13.122
18	15	CS-	13.378	13.55
18	16	CS-	12.567	12.136
18	17	CS+	14.158	13.697
18	18	CS-	12.133	13.363
18	19	CS-	11.532	11.983
18	20	CS+	11.465	11.236
18	21	CS-	11.695	11.407
18	22	CS+	10.94	10.886
18	23	CS-	14.151	12.172
18	24	CS+	10.711	11.436
18	25	CS+	10.651	10.499
18	26	CS-	10.324	10.164
18	27	CS-	9.62	9.485
18	28	CS+	9.473	9.194
18	29	CS-	8.805	8.737
18	30	CS-	9.153	8.813
18	31	CS+	8.025	7.924
18	32	CS+	8.593	8.496
19	1	CS-	9.206	10.209
19	2	CS+	11.956	11.751
19	3	CS-	11.807	12.055
19	4	CS-	11.16	11.78
19	5	CS+	10.675	10.857
19	6	CS+	11.186	10.874
19	7	CS-	10.541	10.534
19	8	CS+	9.941	9.818
19	9	CS-	9.564	9.396
19	10	CS+	8.831	8.755
19	11	CS-	8.694	8.595
19	12	CS+	8.267	8.171
19	13	CS-	7.982	7.939
19	14	CS-	7.603	7.552
19	15	CS+	7.255	7.197
19	16	CS-	7.327	7.238
19	17	CS-	7.566	7.461
19	18	CS+	7.131	7.066
19	19	CS+	6.755	6.711
19	20	CS-	6.496	6.453
19	21	CS+	6.279	6.238
19	22	CS+	6.177	6.141
19	23	CS-	5.977	5.947
19	24	CS-	5.797	5.779
19	25	CS+	5.654	5.641
19	26	CS+	5.599	5.574
19	27	CS-	5.451	5.437
19	28	CS+	5.36	5.336
19	29	CS-	5.245	5.233
19	30	CS+	5.169	5.151
19	31	CS-	5.076	5.057
19	32	CS+	4.963	4.955
20	1	CS+	2.15	2.165
20	2	CS-	2.267	2.237
20	3	CS+	2.078	2.045
20	4	CS-	2.009	1.98
20	5	CS-	1.855	1.843
20	6	CS+	1.775	1.754
20	7	CS+	1.83	1.806
20	8	CS-	1.791	1.77
20	9	CS-	1.66	1.682
20	10	CS+	1.687	1.666
20	11	CS-	1.75	1.725
20	12	CS-	1.644	1.626
20	13	CS+	1.584	1.567
20	14	CS-	1.641	1.62
20	15	CS+	1.522	1.511
20	16	CS+	1.49	1.475
20	17	CS-	1.415	1.402
20	18	CS+	1.353	1.342
20	19	CS+	1.31	1.298
20	20	CS-	1.251	1.241
20	21	CS+	1.197	1.188
20	22	CS-	1.341	2.237
20	23	CS+	3.514	3.411
20	24	CS-	4.359	4.193
20	25	CS-	3.564	3.443
20	26	CS+	3.027	2.936
20	27	CS+	2.636	2.594
20	28	CS-	2.488	2.684
20	29	CS+	2.418	2.379
20	30	CS+	2.242	2.233
20	31	CS-	2.111	2.082
20	32	CS-	1.935	1.91

## Sheet: Pupil Size
Subject	Trial Number	Trial CS	BL	Peak
1	1	CS+	38.2833	40.6			KEY
1	2	CS-	38.2683	40			BL = Baseline
1	3	CS+	38.9815	47.2			NaN = Period did not have enough samples to be included in the analysis due to pupil loss during recording
1	4	CS+	38.4333	46.2857
1	5	CS-	36.3962	43.6
1	6	CS-	37.05	39.8571
1	7	CS+	35.86	43.1429
1	8	CS-	37.1	39.8
1	9	CS+	33.7826	1175.05
1	10	CS-	34.5882	NaN
1	11	CS+	32.6333	41
1	12	CS-	35.4151	36.7143
1	13	CS+	NaN	NaN
1	14	CS+	39.3953	NaN
1	15	CS-	31.9057	40.6
1	16	CS+	34.7333	42.4
1	17	CS+	33.4333	43
1	18	CS-	32.6724	34.4286
1	19	CS-	31.6	37.5714
1	20	CS+	33	38.5714
1	21	CS-	34.9024	NaN
1	22	CS-	NaN	NaN
1	23	CS+	34.0833	40.1429
1	24	CS+	32.0833	39
1	25	CS-	34.463	42
1	26	CS-	32.5333	34.5
1	27	CS+	30.1167	36
1	28	CS-	30.0208	39
1	29	CS+	30.6279	34.5
1	30	CS-	30.4833	32
1	31	CS+	28.3167	35.7143
1	32	CS-	28.6667	33.8571
2	1	CS-	51.3704	57.8
2	2	CS+	57.3667	61.1429
2	3	CS-	57.9333	66.2857
2	4	CS+	58.3519	61.8571
2	5	CS+	59.8372	62
2	6	CS-	61.6842	64
2	7	CS-	56.4667	59.7143
2	8	CS+	57.9167	61.2
2	9	CS+	57.0517	60
2	10	CS-	58.9333	62
2	11	CS+	56.2667	60.8571
2	12	CS+	53.1538	61
2	13	CS-	53.6333	59.1667
2	14	CS+	53.7963	60.3333
2	15	CS-	50.8167	57.5714
2	16	CS-	52.5333	57.3333
2	17	CS+	53.6167	60
2	18	CS-	58.5294	57.4
2	19	CS-	51.4167	NaN
2	20	CS+	53.1167	54.8
2	21	CS-	51.65	54.8
2	22	CS+	60.5	58.1667
2	23	CS-	58.7619	NaN
2	24	CS+	57.0667	61.1429
2	25	CS+	53.5	57.6667
2	26	CS-	53.5333	61
2	27	CS-	56.3846	54.6667
2	28	CS+	52.0167	59.5714
2	29	CS-	54.0667	55.2857
2	30	CS-	53.3061	56.6667
2	31	CS+	51.7833	58.8
2	32	CS+	50.3725	56.8571
3	1	CS+	37.3833	46
3	2	CS-	42.0333	48.2857
3	3	CS+	36.6	51.1429
3	4	CS+	36.2292	48.1667
3	5	CS-	35.1167	45.7143
3	6	CS-	43.9667	48.4
3	7	CS+	37.35	47.4
3	8	CS-	36.4333	43.8571
3	9	CS+	33.7826	1175.05
3	10	CS-	33.1296	41.6
3	11	CS+	NaN	NaN
3	12	CS-	38.3333	46.2
3	13	CS+	NaN	NaN
3	14	CS+	34.15	46.5714
3	15	CS-	41.2333	47.5
3	16	CS+	39.9333	46.2
3	17	CS+	40.8167	46
3	18	CS-	40.7333	NaN
3	19	CS-	30.2292	45
3	20	CS+	39.3167	46.4286
3	21	CS-	40.75	45.1667
3	22	CS-	34.0167	51.2857
3	23	CS+	37.0667	43.3333
3	24	CS+	43.25	46.4286
3	25	CS-	36.1333	52.7143
3	26	CS-	37.7667	48
3	27	CS+	35.85	49.1429
3	28	CS-	NaN	NaN
3	29	CS+	34.8367	44.2
3	30	CS-	39.2333	45
3	31	CS+	34.8333	46.1429
3	32	CS-	39.8	45
4	1	CS+	60.4333	66.5714
4	2	CS-	60.7931	66.1429
4	3	CS+	61.75	65.6667
4	4	CS-	61.9167	66.7143
4	5	CS-	64.6379	66.4286
4	6	CS+	67.4286	68
4	7	CS+	65.1273	70.5
4	8	CS-	65.1698	68.3333
4	9	CS-	61.3	65.8
4	10	CS+	65.1273	70.5
4	11	CS-	64.9091	65.2
4	12	CS-	64.8814	65.2857
4	13	CS+	63.6364	66.4286
4	14	CS-	65.2407	63
4	15	CS+	63.434	66.5714
4	16	CS+	55.45	67.1429
4	17	CS-	62.0426	66.7143
4	18	CS+	56	66.1429
4	19	CS+	53.9	65.6
4	20	CS-	47.3	65
4	21	CS+	59.6	63.8571
4	22	CS-	60.0566	62.8333
4	23	CS+	60.8182	65.8571
4	24	CS-	59.8167	62.7143
4	25	CS-	57.0833	57.6
4	26	CS+	57.7833	63.3333
4	27	CS+	58.6667	64
4	28	CS-	55.1481	55.8
4	29	CS+	50.2333	60.1429
4	30	CS+	58.2407	62.2857
4	31	CS-	51.8333	59.1429
4	32	CS-	61.0833	62.4286
5	1	CS-	42.7667	46
5	2	CS+	40	44
5	3	CS-	40.9167	43
5	4	CS+	38.7167	40
5	5	CS+	41.1667	42
5	6	CS-	NaN	NaN
5	7	CS-	39.5	41.7143
5	8	CS+	36.0333	38.8333
5	9	CS+	39.6167	41
5	10	CS-	40.8727	41
5	11	CS+	39.2143	42.2857
5	12	CS+	39.1	40
5	13	CS-	41.7667	42
5	14	CS+	38.9833	41.7143
5	15	CS-	38.25	40.5714
5	16	CS-	40.4833	42
5	17	CS+	36.85	40
5	18	CS-	37.7	38.5714
5	19	CS-	35.7547	44.1429
5	20	CS+	36.5849	41
5	21	CS-	36.6	NaN
5	22	CS+	39.2167	38.4
5	23	CS-	40.5	40.8333
5	24	CS+	32.9322	39.8571
5	25	CS+	39.9833	39
5	26	CS-	41.5098	42.4
5	27	CS-	38.3	40.7143
5	28	CS+	35.8333	38
5	29	CS-	41.5333	39.3333
5	30	CS-	38.14	40.7143
5	31	CS+	37.65	43
5	32	CS+	37.7333	38
6	1	CS+	47.2	53.5
6	2	CS-	50.5333	50.4
6	3	CS+	49.7167	51.4286
6	4	CS-	53.6167	50.1429
6	5	CS-	57.3	54
6	6	CS+	46.9667	55
6	7	CS+	48.9667	47
6	8	CS-	50.5333	55
6	9	CS-	45.9333	49.8
6	10	CS+	48.9667	47
6	11	CS-	44.0667	48
6	12	CS-	50.15	49
6	13	CS+	43.6667	46
6	14	CS-	38.75	47.2857
6	15	CS+	51.1	50
6	16	CS+	43.3167	49
6	17	CS-	43.0167	45
6	18	CS+	40.9833	44
6	19	CS+	42.3529	46.6
6	20	CS-	40.2833	43.1429
6	21	CS+	38	42.8
6	22	CS-	41.25	48.8333
6	23	CS+	37.8333	47
6	24	CS-	38.1186	47
6	25	CS-	37.9667	45
6	26	CS+	37.2333	46.7143
6	27	CS+	37.1905	49
6	28	CS-	47.5833	49
6	29	CS+	46.0833	45.6667
6	30	CS+	45.9333	48
6	31	CS-	42.6458	42
6	32	CS-	38.75	44
7	1	CS-	46.9667	46
7	2	CS+	46.6667	49.5
7	3	CS-	45	48.5
7	4	CS-	44	53.7143
7	5	CS+	47.3818	51.8571
7	6	CS+	47.9825	46.4
7	7	CS-	45.3833	51.2
7	8	CS+	45.0833	NaN
7	9	CS-	43.6167	50.5714
7	10	CS+	46.6833	52
7	11	CS-	41.15	51.7143
7	12	CS+	44.2833	52.5714
7	13	CS-	40.8333	NaN
7	14	CS-	37.3	50.1429
7	15	CS+	43.55	49
7	16	CS-	43.85	48.5714
7	17	CS-	43.6333	51.2
7	18	CS+	45.3167	52
7	19	CS+	41.2667	NaN
7	20	CS-	44.75	47.4
7	21	CS+	43.1667	50.5714
7	22	CS+	42.9811	48.7143
7	23	CS-	44	53.7143
7	24	CS-	41.4167	47.2857
7	25	CS+	39.96	50
7	26	CS+	41.45	47.1429
7	27	CS-	41.4333	47.7143
7	28	CS+	46.8868	47.4286
7	29	CS-	44.3667	45
7	30	CS+	45.1833	47.4
7	31	CS-	45.8333	47.2857
7	32	CS+	46.2667	46.5
8	1	CS+	33.3667	36
8	2	CS-	34.6	35.6667
8	3	CS+	34.75	37
8	4	CS+	33.7667	36.1429
8	5	CS-	38.8644	38
8	6	CS-	35.1667	37
8	7	CS+	35.8667	36
8	8	CS-	37.45	38
8	9	CS+	33.7826	1175.05
8	10	CS-	33.3333	36.1429
8	11	CS+	35.0667	37
8	12	CS-	35.1167	36.7143
8	13	CS+	33.5	38
8	14	CS+	36.0333	36.8
8	15	CS-	35.7167	36
8	16	CS+	33.7833	36.1429
8	17	CS+	34.2833	36
8	18	CS-	35.5833	36.8
8	19	CS-	34.5333	35.1429
8	20	CS+	32.1	35
8	21	CS-	32.5833	35
8	22	CS-	33.4833	37
8	23	CS+	33.5833	33.8
8	24	CS+	30.3729	36
8	25	CS-	28.283	35
8	26	CS-	25.2	35.5714
8	27	CS+	31.7255	36.1429
8	28	CS-	30	35.1429
8	29	CS+	34.2333	35.8571
8	30	CS-	NaN	NaN
8	31	CS+	24.439	36.7143
8	32	CS-	NaN	NaN
9	1	CS+	41.0833	44.1429
9	2	CS-	40.8167	44
9	3	CS+	43.15	45.2857
9	4	CS+	40.8814	43
9	5	CS-	42.7358	43.6667
9	6	CS-	43.0167	44
9	7	CS+	41.5	NaN
9	8	CS-	40.5	46
9	9	CS+	33.7826	1175.05
9	10	CS-	41.3636	51.4
9	11	CS+	39.8621	49.4
9	12	CS-	40.65	42.5
9	13	CS+	40.8333	43
9	14	CS+	41.0612	48.2
9	15	CS-	40.75	46.6667
9	16	CS+	47.9167	46.4
9	17	CS+	41.9167	45.6667
9	18	CS-	41.1569	NaN
9	19	CS-	41.5085	44.8
9	20	CS+	43.9123	48.1429
9	21	CS-	40.52	46
9	22	CS-	39.1176	45
9	23	CS+	36.74	45.1429
9	24	CS+	37.1702	38.6667
9	25	CS-	41.32	47.8571
9	26	CS-	36.0167	46.4
9	27	CS+	37	42.7143
9	28	CS-	35.9804	41.8571
9	29	CS+	33.8085	46.6
9	30	CS-	33.2167	41.5714
9	31	CS+	40.9455	43
9	32	CS-	35.75	40.2857
10	1	CS-	50.5833	50
10	2	CS+	51.6923	50.1667
10	3	CS-	54.0962	54.4
10	4	CS+	53.537	66.4
10	5	CS+	53.1667	59.8333
10	6	CS-	50.5926	58.3333
10	7	CS-	52.2167	NaN
10	8	CS+	49	52
10	9	CS+	50	53.5714
10	10	CS-	53.3333	54
10	11	CS+	40.4694	54
10	12	CS+	43.5	51.2
10	13	CS-	46.339	NaN
10	14	CS+	46.7167	54
10	15	CS-	43.2308	50.8333
10	16	CS-	49.3036	50.6
10	17	CS+	50.2333	62
10	18	CS-	48.678	NaN
10	19	CS-	47.8909	47.2
10	20	CS+	43.92	56
10	21	CS-	48.8542	53.4
10	22	CS+	46.9667	61
10	23	CS-	44.3636	49
10	24	CS+	43.1	62
10	25	CS+	43.9667	63
10	26	CS-	47.6167	50.7143
10	27	CS-	53.2281	56.4286
10	28	CS+	47.0333	54
10	29	CS-	49.0769	52
10	30	CS-	54.7037	51.6
10	31	CS+	53.0926	54
10	32	CS+	50.42	58.6
11	1	CS-	34.9286	40.8571
11	2	CS+	39.6167	39.4
11	3	CS-	37.6607	41
11	4	CS-	35.9322	NaN
11	5	CS+	37.0169	42.5714
11	6	CS+	38.5273	40
11	7	CS-	34.7857	40.8
11	8	CS+	35.98	45.3333
11	9	CS-	35.5556	NaN
11	10	CS+	37.1636	41.2
11	11	CS-	33.8333	39.8571
11	12	CS+	38.3654	42.6
11	13	CS-	35.9057	40
11	14	CS-	35.3774	40.5
11	15	CS+	32.2667	40
11	16	CS-	35.9231	43
11	17	CS-	38.537	40.4286
11	18	CS+	33.463	39.2
11	19	CS+	35.6604	39.2
11	20	CS-	34.7593	39.2
11	21	CS+	34.3333	41.8571
11	22	CS+	33.75	40.8571
11	23	CS-	33.2807	39.4286
11	24	CS-	35.5769	38
11	25	CS+	34.0566	38
11	26	CS+	33.6833	38.4286
11	27	CS-	31.68	38.5714
11	28	CS+	32.2642	39.2
11	29	CS-	31.3519	37.5
11	30	CS+	32.1489	39.4
11	31	CS-	33.8667	38
11	32	CS+	31.1698	38
12	1	CS+	35	37.4286
12	2	CS-	35.5833	38.2736
12	3	CS+	34.98	39.8333
12	4	CS-	34.1346	NaN
12	5	CS-	31.9833	33.7763
12	6	CS+	36.3019	39.8571
12	7	CS+	37.0333	39.8571
12	8	CS-	35.1167	35.226
12	9	CS-	36.2712	36.4738
12	10	CS+	37.0333	39.8571
12	11	CS-	37.2	39.4577
12	12	CS-	36.6333	38.0058
12	13	CS+	35.3167	39
12	14	CS-	37.2667	38.1281
12	15	CS+	33.5254	38
12	16	CS+	34.0167	37
12	17	CS-	33.9	41.853
12	18	CS+	34.5769	36.1429
12	19	CS+	32.5167	36
12	20	CS-	31.3729	NaN
12	21	CS+	33.6271	34.4
12	22	CS-	31.4833	31.7425
12	23	CS+	33.8814	36.1429
12	24	CS-	30.1698	30.8168
12	25	CS-	31.9322	32.617
12	26	CS+	31.7442	37.5714
12	27	CS+	32.5536	36
12	28	CS-	35.6	37.8441
12	29	CS+	33.3276	34.3333
12	30	CS+	33.45	35.2857
12	31	CS-	33.4737	31.7006
12	32	CS-	31.6667	33.804
13	1	CS+	44.963	NaN
13	2	CS-	45.5849	49.1667
13	3	CS+	45.5185	47.2
13	4	CS+	42.6538	50.8
13	5	CS-	44.5094	47.7143
13	6	CS-	45.7551	49.1429
13	7	CS+	44.3962	48.2857
13	8	CS-	42.08	47.6
13	9	CS+	33.7826	1175.05
13	10	CS-	43.3902	47.5714
13	11	CS+	46.3091	NaN
13	12	CS-	44.1091	42.8571
13	13	CS+	46.22	46.8571
13	14	CS+	41.1765	NaN
13	15	CS-	43.6842	44.6667
13	16	CS+	42.2292	44.6667
13	17	CS+	41.8	46
13	18	CS-	41.1091	42.6
13	19	CS-	42.1	44.7143
13	20	CS+	41.7333	45.8571
13	21	CS-	41.4906	41.6667
13	22	CS-	41.1481	NaN
13	23	CS+	41.3	42.1429
13	24	CS+	39.5833	42.7143
13	25	CS-	41.7115	41.8
13	26	CS-	38.8679	41.8333
13	27	CS+	37.7222	41.8571
13	28	CS-	40.4	40.3333
13	29	CS+	37.4615	43
13	30	CS-	38.7308	40
13	31	CS+	37.9811	41
13	32	CS-	39.2353	39.8333
14	1	CS-	39.05	40.8171
14	2	CS+	43.4151	47
14	3	CS-	43.8833	52.569
14	4	CS+	47.5636	50.2857
14	5	CS+	41.7167	52
14	6	CS-	40.7018	43.7856
14	7	CS-	40.8333	43.805
14	8	CS+	41.1333	50
14	9	CS+	39.4	45.5714
14	10	CS-	37.95	NaN
14	11	CS+	40.6	47
14	12	CS+	38.1333	48.8571
14	13	CS-	39.7778	50.6173
14	14	CS+	41.35	46
14	15	CS-	37.8167	39.8493
14	16	CS-	40.7308	48.4276
14	17	CS+	37.2642	46.1429
14	18	CS-	40.1731	NaN
14	19	CS-	38.3833	NaN
14	20	CS+	37.7059	48
14	21	CS-	38.8148	47.3036
14	22	CS+	35.2679	45
14	23	CS-	34.7119	36.8102
14	24	CS+	39.2449	47
14	25	CS+	42.0333	45
14	26	CS-	39.7593	51.6512
14	27	CS-	37.9615	39.8503
14	28	CS+	35.9833	41.5714
14	29	CS-	34.322	40.5365
14	30	CS-	35.0727	41.4231
14	31	CS+	32.8333	43.1429
14	32	CS+	33.0833	40.7143
15	1	CS+	37.3833	46
15	2	CS-	42.0333	48.2857
15	3	CS+	36.6	51.1429
15	4	CS+	36.2292	48.1667
15	5	CS-	35.1167	45.7143
15	6	CS-	43.9667	48.4
15	7	CS+	37.35	47.4
15	8	CS-	36.4333	43.8571
15	9	CS+	33.7826	1175.05
15	10	CS-	33.1296	41.6
15	11	CS+	NaN	NaN
15	12	CS-	38.3333	46.2
15	13	CS+	NaN	NaN
15	14	CS+	34.15	46.5714
15	15	CS-	41.2333	47.5
15	16	CS+	39.9333	46.2
15	17	CS+	40.8167	46
15	18	CS-	40.7333	NaN
15	19	CS-	30.2292	45
15	20	CS+	39.3167	46.4286
15	21	CS-	40.75	45.1667
15	22	CS-	34.0167	51.2857
15	23	CS+	37.0667	43.3333
15	24	CS+	43.25	46.4286
15	25	CS-	36.1333	52.7143
15	26	CS-	37.7667	48
15	27	CS+	35.85	49.1429
15	28	CS-	NaN	NaN
15	29	CS+	34.8367	44.2
15	30	CS-	39.2333	45
15	31	CS+	34.8333	46.1429
15	32	CS-	39.8	45
16	1	CS+	37.3833	46
16	2	CS-	42.0333	48.2857
16	3	CS+	36.6	51.1429
16	4	CS+	36.2292	48.1667
16	5	CS-	35.1167	45.7143
16	6	CS-	43.9667	48.4
16	7	CS+	37.35	47.4
16	8	CS-	36.4333	43.8571
16	9	CS+	33.7826	1175.05
16	10	CS-	33.1296	41.6
16	11	CS+	NaN	NaN
16	12	CS-	38.3333	46.2
16	13	CS+	NaN	NaN
16	14	CS+	34.15	46.5714
16	15	CS-	41.2333	47.5
16	16	CS+	39.9333	46.2
16	17	CS+	40.8167	46
16	18	CS-	40.7333	NaN
16	19	CS-	30.2292	45
16	20	CS+	39.3167	46.4286
16	21	CS-	40.75	45.1667
16	22	CS-	34.0167	51.2857
16	23	CS+	37.0667	43.3333
16	24	CS+	43.25	46.4286
16	25	CS-	36.1333	52.7143
16	26	CS-	37.7667	48
16	27	CS+	35.85	49.1429
16	28	CS-	NaN	NaN
16	29	CS+	34.8367	44.2
16	30	CS-	39.2333	45
16	31	CS+	34.8333	46.1429
16	32	CS-	39.8	45
17	1	CS+	NaN	NaN
17	2	CS-	42.1754	45.4286
17	3	CS+	36	44
17	4	CS-	37.0213	41.7143
17	5	CS-	39.0385	40.6
17	6	CS+	32.3913	39
17	7	CS+	34.2642	41
17	8	CS-	37.6667	43.2857
17	9	CS-	34.5833	39
17	10	CS+	34.2642	41
17	11	CS-	36.1356	38.5714
17	12	CS-	33.6964	36
17	13	CS+	31.9661	38.2857
17	14	CS-	34.9825	38
17	15	CS+	33.1667	37.8571
17	16	CS+	33.3	40
17	17	CS-	38.0172	38
17	18	CS+	34.4667	37.7143
17	19	CS+	34.3208	39
17	20	CS-	33.8333	37.2
17	21	CS+	33.45	37
17	22	CS-	34.85	35
17	23	CS+	30.5667	36
17	24	CS-	31.85	37
17	25	CS-	33.4182	36.8
17	26	CS+	33.7333	35.5714
17	27	CS+	33.1	39
17	28	CS-	31.963	36
17	29	CS+	32.7	35
17	30	CS+	33.9667	35.3333
17	31	CS-	33.4808	35.4286
17	32	CS-	33.6939	34
18	1	CS-	43.5741	44.8333
18	2	CS+	42.5667	48
18	3	CS-	44.1167	NaN
18	4	CS+	40.0333	48.7143
18	5	CS+	43.2167	48
18	6	CS-	43.3	45.5
18	7	CS-	41.8	44.8
18	8	CS+	41.4444	46.1429
18	9	CS+	43	47
18	10	CS-	41.3667	44
18	11	CS+	39.4833	46
18	12	CS+	43.6667	44.3333
18	13	CS-	43.1481	42.7143
18	14	CS+	42.2833	46
18	15	CS-	41.3667	42
18	16	CS-	41.4182	43
18	17	CS+	42.1429	45
18	18	CS-	43.45	46
18	19	CS-	38.4167	43
18	20	CS+	37.9667	46
18	21	CS-	41.15	42
18	22	CS+	46.5167	43.8
18	23	CS-	44.6182	43.4
18	24	CS+	43.8167	45.6
18	25	CS+	40.434	42
18	26	CS-	46.4667	50
18	27	CS-	37.9167	41.8571
18	28	CS+	40.5833	42
18	29	CS-	37.4167	42
18	30	CS-	35.8667	42
18	31	CS+	34.35	41.6
18	32	CS+	40.9434	44
19	1	CS-	35.02	36
19	2	CS+	35.3729	34
19	3	CS-	31.7458	35
19	4	CS-	34.3667	36
19	5	CS+	34	34.8333
19	6	CS+	30.8621	35
19	7	CS-	30.3958	37.2
19	8	CS+	32.4107	34.4
19	9	CS-	36.5263	36.8571
19	10	CS+	33.6182	37.4286
19	11	CS-	28.9167	34
19	12	CS+	31.6333	34
19	13	CS-	31.6333	35
19	14	CS-	29.069	33.8333
19	15	CS+	30.4906	36
19	16	CS-	30.2881	34.6667
19	17	CS-	29.6316	34.8571
19	18	CS+	29.7407	35
19	19	CS+	30.3725	32
19	20	CS-	29.95	32.7143
19	21	CS+	35.1961	35
19	22	CS+	28.8269	32
19	23	CS-	27.22	31.5714
19	24	CS-	NaN	NaN
19	25	CS+	25.6809	31.4286
19	26	CS+	30.2115	31.6
19	27	CS-	NaN	NaN
19	28	CS+	27.7241	33.2857
19	29	CS-	30.3519	34
19	30	CS+	26.8833	30
19	31	CS-	27.8103	31
19	32	CS+	26.2727	32.8571
20	1	CS+	31.75	32
20	2	CS-	29.098	38.5714
20	3	CS+	31.45	35
20	4	CS-	36.322	38.1667
20	5	CS-	31.5556	38.4286
20	6	CS+	34.4889	36
20	7	CS+	30.9828	39
20	8	CS-	NaN	NaN
20	9	CS-	33.625	43
20	10	CS+	30.9828	39
20	11	CS-	34.125	36
20	12	CS-	32.9833	35.5714
20	13	CS+	32.7833	37
20	14	CS-	30.3833	33
20	15	CS+	31.6833	37
20	16	CS+	28.7	35
20	17	CS-	29.0638	30.1667
20	18	CS+	30.8125	36.6667
20	19	CS+	30.15	33.8571
20	20	CS-	30.9	31
20	21	CS+	28.25	35
20	22	CS-	31.5667	36
20	23	CS+	30.8909	33
20	24	CS-	29.9828	31
20	25	CS-	29.25	29
20	26	CS+	27.65	36
20	27	CS+	29.6667	35
20	28	CS-	32.8571	33
20	29	CS+	29.0833	31
20	30	CS+	28.4667	36
20	31	CS-	28.125	29.1429
20	32	CS-	25.6889	26

## Sheet: Prop. Viewing
Subject	Version	Trial Number	Trial CS	Total Time	Pot	Toy
1	1A	1	CS+	7347.38	1161.51	866.705
1	1A	2	CS-	7966.97	721.732	838.996					KEY
1	1A	3	CS+	7157.3	632.676	469.011					Version: 1A = silver pot CS+, 1B = black pot CS+, 2A = yellow toy CS+, 2B = purple toy CS+
1	1A	4	CS+	7515.31	816.25	1872.88
1	1A	5	CS-	5397.57	751.653	827.921
1	1A	6	CS-	6970.22	1509.75	1733.2
1	1A	7	CS+	6398.03	940.367	460.791
1	1A	8	CS-	5684.84	1314.22	760.066
1	1A	9	CS+	6895.85	853.87	303.978
1	1A	10	CS-	7137.02	381.91	522.867
1	1A	11	CS+	6039.35	2853.9	0
1	1A	12	CS-	6850.82	835.604	853.794
1	1A	13	CS+	5484.34	1102.99	0
1	1A	14	CS+	7763.97	1076.19	711.056
1	1A	15	CS-	7929.32	740.436	1372.48
1	1A	16	CS+	6187.27	377.658	2017.19
1	1A	17	CS+	7898.5	1499.81	1499.81
1	1A	18	CS-	6338.96	385.648	900.214
1	1A	19	CS-	7493.02	453.3	294.509
1	1A	20	CS+	6732.47	2642.71	1428.04
1	1A	21	CS-	7393.47	1016.62	617.616
1	1A	22	CS-	7288.17	411.064	593.303
1	1A	23	CS+	6558.33	1863.57	0
1	1A	24	CS+	5338.96	319.988	194.993
1	1A	25	CS-	3405.66	230.613	377.569
1	1A	26	CS-	5386.9	425.715	755.911
1	1A	27	CS+	6138.82	2348.83	0
1	1A	28	CS-	5582.56	276.834	145.536
1	1A	29	CS+	6370.92	884.114	791.398
1	1A	30	CS-	5713.5	761.435	2011.32
1	1A	31	CS+	6920.91	601.72	1147.1
1	1A	32	CS-	6873.3	363.234	2091.15
2	2B	1	CS-	5753.24	219.373	776.399
2	2B	2	CS+	5550.46	517.043	585.547
2	2B	3	CS-	6803.45	0	404.603
2	2B	4	CS+	5109.59	551.211	1203.07
2	2B	5	CS+	6988.95	856.862	2553.83
2	2B	6	CS-	7153.97	0	3635.83
2	2B	7	CS-	6107.4	0	773.321
2	2B	8	CS+	7836.54	0	873.897
2	2B	9	CS+	7824.65	0	2560.25
2	2B	10	CS-	5742.34	569.872	617.283
2	2B	11	CS+	7428.79	0	562.506
2	2B	12	CS+	7740.12	0	3928.34
2	2B	13	CS-	5242.34	2443.71	516.093
2	2B	14	CS+	7157.12	362.569	3368.27
2	2B	15	CS-	7623.59	1929.23	720.153
2	2B	16	CS-	6556.5	746.787	3343.19
2	2B	17	CS+	6188.23	216.344	4624.98
2	2B	18	CS-	7703.08	1334.6	2669.2
2	2B	19	CS-	5239.22	516.516	1453.93
2	2B	20	CS+	5929.06	94.7589	1044.24
2	2B	21	CS-	7994.56	1074.78	666.75
2	2B	22	CS+	7150.67	380.731	94.6127
2	2B	23	CS-	7020.71	346.445	3902.7
2	2B	24	CS+	6522.18	566.64	242.568
2	2B	25	CS+	7161.03	300.733	2486.83
2	2B	26	CS-	6443.88	0	114.702
2	2B	27	CS-	7282.41	268.064	784.718
2	2B	28	CS+	6329.59	0	405.527
2	2B	29	CS-	7843.57	960.284	0
2	2B	30	CS-	5984.79	1521.19	604.752
2	2B	31	CS+	6486.62	0	4947.34
2	2B	32	CS+	5379.01	180.27	180.27
3	1A	1	CS+	5253.67	0	1697.13
3	1A	2	CS-	7851.51	0	2950.96
3	1A	3	CS+	5368.4	0	1621.09
3	1A	4	CS+	5955.48	0	3873.16
3	1A	5	CS-	5780.74	0	176.978
3	1A	6	CS-	7206.95	0	372.735
3	1A	7	CS+	5356.83	0	105.191
3	1A	8	CS-	6485.48	0	93.6667
3	1A	9	CS+	6322.62	0	141.446
3	1A	10	CS-	5310.45	528.609	0
3	1A	11	CS+	5268.68	2399.81	256.241
3	1A	12	CS-	5862.71	940.428	132.083
3	1A	13	CS+	5874.35	2457.61	402.188
3	1A	14	CS+	7489.43	0	214.29
3	1A	15	CS-	6088.46	0	3848.71
3	1A	16	CS+	6187.52	533.748	0
3	1A	17	CS+	5926.44	359.57	114.683
3	1A	18	CS-	6710.6	168.75	0
3	1A	19	CS-	5261.18	0	0
3	1A	20	CS+	6345.93	0	285.059
3	1A	21	CS-	6358.47	441.016	392.014
3	1A	22	CS-	7661.58	0	90.7408
3	1A	23	CS+	6247.21	0	113.216
3	1A	24	CS+	7506.15	937.551	401.644
3	1A	25	CS-	7270.27	0	231.191
3	1A	26	CS-	5404.48	0	177.494
3	1A	27	CS+	5248.07	0	168.143
3	1A	28	CS-	7241.21	0	217.552
3	1A	29	CS+	6632.31	0	2092.13
3	1A	30	CS-	6109.92	0	337.702
3	1A	31	CS+	5390.67	88.97	165.013
3	1A	32	CS-	7582.67	0	0
4	2A	1	CS+	1111.43	0	413.565
4	2A	2	CS-	2176.95	0	978.859
4	2A	3	CS+	2308.55	0	859.014
4	2A	4	CS-	4445.79	0	1999.03
4	2A	5	CS-	4618.12	0	2076.52
4	2A	6	CS+	3498.69	0	1301.87
4	2A	7	CS+	7919.79	0	2946.97
4	2A	8	CS-	5773.91	0	2596.21
4	2A	9	CS-	5389.7	1468.32	707.236
4	2A	10	CS+	7121.67	0	3005.33
4	2A	11	CS-	5962.51	2514.39	1062.92
4	2A	12	CS-	5408.71	0	857.316
4	2A	13	CS+	6876.78	0	3207.82
4	2A	14	CS-	6723.42	123.744	1711.26
4	2A	15	CS+	6901.11	0	3750.58
4	2A	16	CS+	6017.14	0	6017.14
4	2A	17	CS-	7940.14	0	3347.34
4	2A	18	CS+	7348.23	0	6864.16
4	2A	19	CS+	5855.87	0	5676.35
4	2A	20	CS-	5504.67	0	4582.83
4	2A	21	CS+	7365.7	0	7365.7
4	2A	22	CS-	6657.05	0	6481.67
4	2A	23	CS+	6549.49	0	6357.93
4	2A	24	CS-	5757.09	0	4865.45
4	2A	25	CS-	7487.37	485.421	5967.9
4	2A	26	CS+	6135.7	0	5985
4	2A	27	CS+	7029.26	0	6846.53
4	2A	28	CS-	7939.03	0	1477.34
4	2A	29	CS+	6991.24	0	6774.66
4	2A	30	CS+	6217.12	0	6035.71
4	2A	31	CS-	7005.8	0	2579.14
4	2A	32	CS-	7043.53	638.413	474.179
5	2B	1	CS-	2341.34	0	1806.8
5	2B	2	CS+	7749.61	0	3856.8
5	2B	3	CS-	5838.39	0	4505.44
5	2B	4	CS+	6618.4	0	4451.02
5	2B	5	CS+	7799.03	0	6097.3
5	2B	6	CS-	7623.45	0	4358.65
5	2B	7	CS-	7861.98	1340.91	2517.19
5	2B	8	CS+	6627.38	0	5663.68
5	2B	9	CS+	5272.78	0	3885.67
5	2B	10	CS-	5263.18	598.525	1545.15
5	2B	11	CS+	6338.1	812.477	2876.79
5	2B	12	CS+	6114.13	350.108	5232.48
5	2B	13	CS-	7494.55	340.352	4163.64
5	2B	14	CS+	7637.72	0	2425.48
5	2B	15	CS-	7237.14	572.458	1549.45
5	2B	16	CS-	4390.59	242.042	1666.53
5	2B	17	CS+	7217.93	172.54	5048.53
5	2B	18	CS-	7069.17	220.238	3852.97
5	2B	19	CS-	1296.48	33.6597	774.261
5	2B	20	CS+	5589.16	130.666	4950.57
5	2B	21	CS-	2867.48	59.5572	1862.03
5	2B	22	CS+	5275.69	0	4891.37
5	2B	23	CS-	5102.42	79.4824	3579.47
5	2B	24	CS+	5001.49	0	4456.05
5	2B	25	CS+	7160.24	0	6120.13
5	2B	26	CS-	5090.48	52.8643	3836.62
5	2B	27	CS-	2366.58	12.2884	1907.1
5	2B	28	CS+	3123.34	0	1641.82
5	2B	29	CS-	6553.78	0	5623.19
5	2B	30	CS-	3265.56	0	2801.87
5	2B	31	CS+	6281.88	0	1234.92
5	2B	32	CS+	2739.49	0	538.539
6	2A	1	CS+	6373.65	1636.11	893.341
6	2A	2	CS-	7930.33	3996.83	496.655
6	2A	3	CS+	6624.27	1858.65	451.139
6	2A	4	CS-	7864.71	1887.38	466.443
6	2A	5	CS-	7118.58	668.213	1246.54
6	2A	6	CS+	6092.28	3594.25	671.569
6	2A	7	CS+	7527.68	875.509	496.642
6	2A	8	CS-	4873.44	470.478	817.179
6	2A	9	CS-	4120.48	408.792	660.309
6	2A	10	CS+	7296.59	2379.09	1079.33
6	2A	11	CS-	7174.15	730.903	1096.35
6	2A	12	CS-	2868.38	247.708	532.415
6	2A	13	CS+	5902.25	327.591	2029.19
6	2A	14	CS-	5498.98	389.524	1201.03
6	2A	15	CS+	6409.87	0	1547.48
6	2A	16	CS+	7854.82	1494.71	1736.77
6	2A	17	CS-	5833.09	741.64	793.171
6	2A	18	CS+	7219.11	237.784	1030.79
6	2A	19	CS+	6325.27	0	1765.81
6	2A	20	CS-	5561	739.837	1390.02
6	2A	21	CS+	6100.63	272.705	1414.59
6	2A	22	CS-	5009.59	469.729	1823.31
6	2A	23	CS+	7595.58	1002.68	4290.28
6	2A	24	CS-	6191.43	337.381	2959.31
6	2A	25	CS-	5730.51	304.291	2598.32
6	2A	26	CS+	5417.23	445.076	1381.21
6	2A	27	CS+	6226.87	629.237	4305.41
6	2A	28	CS-	1090.28	57.8943	494.355
6	2A	29	CS+	7348.24	0	2291.15
6	2A	30	CS+	7599.91	0	0
6	2A	31	CS-	2995.59	159.066	1358.26
6	2A	32	CS-	3996.39	212.209	1812.04
7	1B	1	CS-	5662.08	715.287	1172.38
7	1B	2	CS+	6435.74	968.313	623.893
7	1B	3	CS-	7665.87	1602.6	540.371
7	1B	4	CS-	7284.08	530.685	897.518
7	1B	5	CS+	7104.68	739.516	481.184
7	1B	6	CS+	7586.67	357.132	635.695
7	1B	7	CS-	7410.45	1759.72	512.588
7	1B	8	CS+	7641.01	349.557	1293.61
7	1B	9	CS-	7229.93	706.391	2045.64
7	1B	10	CS+	7445.87	590.11	346.263
7	1B	11	CS-	6933.44	450.139	0
7	1B	12	CS+	7071.12	591.227	335.147
7	1B	13	CS-	7832.94	152.615	0
7	1B	14	CS-	5707.59	202.841	186.95
7	1B	15	CS+	6881.53	663.658	3126.73
7	1B	16	CS-	5946.38	381.132	472.53
7	1B	17	CS-	5609.72	520.674	535.83
7	1B	18	CS+	7660.21	574.011	2336.37
7	1B	19	CS+	6737.38	0	514.861
7	1B	20	CS-	6871.38	799.628	382.612
7	1B	21	CS+	5669.67	2058.43	353.664
7	1B	22	CS+	5248.06	315.551	270.472
7	1B	23	CS-	5390.13	1445.89	182.562
7	1B	24	CS-	6290.21	0	284.779
7	1B	25	CS+	5933.4	0	182.314
7	1B	26	CS+	6036.41	428.385	222.76
7	1B	27	CS-	7037.89	237.046	296.307
7	1B	28	CS+	7830.84	0	631.715
7	1B	29	CS-	7731.67	2309.12	350.878
7	1B	30	CS+	5439.25	1105.23	164.799
7	1B	31	CS-	6692.42	1147.3	2008.07
7	1B	32	CS+	7964.8	363.335	816.483
8	1A	1	CS+	5463.79	1034.46	277.584
8	1A	2	CS-	5831.71	2497.26	971.653
8	1A	3	CS+	7703.96	3505.35	903.388
8	1A	4	CS+	6518.42	512.313	177.067
8	1A	5	CS-	6988.26	1713.04	1694.58
8	1A	6	CS-	6151.25	1810.61	1776.45
8	1A	7	CS+	7666.34	1174.02	256.057
8	1A	8	CS-	7473.39	2029.4	438.229
8	1A	9	CS+	5493.53	1146.34	193.585
8	1A	10	CS-	7111.85	3192.18	1891.93
8	1A	11	CS+	5310.4	1789.64	0
8	1A	12	CS-	6151.38	1828.39	1147.22
8	1A	13	CS+	5499.1	625.994	566.163
8	1A	14	CS+	5471.33	724.25	1212.7
8	1A	15	CS-	5479.04	3067.04	87.1072
8	1A	16	CS+	7724.53	1518.39	1428.68
8	1A	17	CS+	6877.4	1920.85	233.515
8	1A	18	CS-	5643.96	309.487	370.643
8	1A	19	CS-	7676.5	2594.23	528.455
8	1A	20	CS+	6221.48	3884.52	302.454
8	1A	21	CS-	6952.52	4394.44	0
8	1A	22	CS-	5321.63	984.867	103.067
8	1A	23	CS+	7831.37	5898.95	0
8	1A	24	CS+	5404.73	1679.66	0
8	1A	25	CS-	7153.08	2027.98	0
8	1A	26	CS-	6988.28	3728.55	122.087
8	1A	27	CS+	7543.86	4229.37	850.84
8	1A	28	CS-	6363.16	763.758	0
8	1A	29	CS+	7541.85	6048.29	0
8	1A	30	CS-	5182.49	311.022	0
8	1A	31	CS+	6903	0	0
8	1A	32	CS-	5372.16	0	0
9	1A	1	CS+	7794.55	727.731	984.427
9	1A	2	CS-	6893.65	685.366	964.178
9	1A	3	CS+	7638.94	0	2225.84
9	1A	4	CS+	7470.35	668.196	190.3
9	1A	5	CS-	7978.68	1659.52	1213.07
9	1A	6	CS-	7027.97	0	2752.23
9	1A	7	CS+	6209.56	0	2714.73
9	1A	8	CS-	5342.93	234.383	1831.32
9	1A	9	CS+	7407.19	0	315.247
9	1A	10	CS-	5004.37	347.291	1011.38
9	1A	11	CS+	6006.41	0	585.06
9	1A	12	CS-	6023.96	571.837	370.131
9	1A	13	CS+	7648.25	157.513	632.42
9	1A	14	CS+	7005.22	579.431	637.258
9	1A	15	CS-	6016.82	817.667	196.083
9	1A	16	CS+	7842.34	1556.03	0
9	1A	17	CS+	7152.73	120.396	261.259
9	1A	18	CS-	6419.86	870.739	1572.33
9	1A	19	CS-	6741.62	183.097	407.695
9	1A	20	CS+	7136.86	0	357.346
9	1A	21	CS-	5978.72	618.52	247.223
9	1A	22	CS-	7029.35	1576.85	0
9	1A	23	CS+	5302.86	1104.72	0
9	1A	24	CS+	4745.69	1276.12	215.75
9	1A	25	CS-	4879.5	835.136	50.5107
9	1A	26	CS-	4447.49	524.72	92.0775
9	1A	27	CS+	6228.83	2052.24	566.354
9	1A	28	CS-	5942.42	385.129	184.541
9	1A	29	CS+	7780.06	1302.77	1661.85
9	1A	30	CS-	5983.42	777.501	333.215
9	1A	31	CS+	7804.31	869.973	444.68
9	1A	32	CS-	1545.49	200.825	86.0679
10	2B	1	CS-	7773.3	1151.56	1939.59
10	2B	2	CS+	7640.61	1366.42	803.704
10	2B	3	CS-	6308.16	1906.66	532.547
10	2B	4	CS+	7057.33	269.467	1056.31
10	2B	5	CS+	7663.37	1219.26	309.456
10	2B	6	CS-	6833.55	1420.52	308.54
10	2B	7	CS-	7834.32	1680.37	371.382
10	2B	8	CS+	5421.83	331.304	225.684
10	2B	9	CS+	6533.59	1217.3	1198.77
10	2B	10	CS-	7130.65	2289.84	297.948
10	2B	11	CS+	5367.4	511.511	775.676
10	2B	12	CS+	7594.72	378.721	518.501
10	2B	13	CS-	5718.45	366.708	383.695
10	2B	14	CS+	7926.14	407.028	3213.86
10	2B	15	CS-	6711.44	315.091	332.946
10	2B	16	CS-	3754.38	140.616	161.324
10	2B	17	CS+	4196.48	333.339	2041.04
10	2B	18	CS-	6867.1	191.998	249.483
10	2B	19	CS-	6874.74	0	673.141
10	2B	20	CS+	6781.06	729.055	3846.64
10	2B	21	CS-	7854.68	0	236.551
10	2B	22	CS+	2995.39	161.023	1534.32
10	2B	23	CS-	7038.19	794.872	1703.13
10	2B	24	CS+	5585.36	0	2553.58
10	2B	25	CS+	6349.87	0	489.617
10	2B	26	CS-	7573.83	0	180.645
10	2B	27	CS-	2784.32	156.352	134.939
10	2B	28	CS+	5718.55	237.995	1095.73
10	2B	29	CS-	6613.07	742.704	483.259
10	2B	30	CS-	2954.01	331.76	215.868
10	2B	31	CS+	7648.95	0	7433.15
10	2B	32	CS+	3761.2	0	3655.08
11	1B	1	CS-	5508.71	1195.53	575.09
11	1B	2	CS+	7256	714.947	3132.15
11	1B	3	CS-	5803.39	0	3734.32
11	1B	4	CS-	1719.82	65.1556	649.902
11	1B	5	CS+	6239.98	1014.53	3721.21
11	1B	6	CS+	5496.73	1587.36	616.62
11	1B	7	CS-	1058.04	80.1679	118.827
11	1B	8	CS+	6764.27	1386.89	959.561
11	1B	9	CS-	7041.83	705.773	525.212
11	1B	10	CS+	5286.44	878.242	566.526
11	1B	11	CS-	7823.55	975.452	288.383
11	1B	12	CS+	5112.38	1053.81	596.759
11	1B	13	CS-	6161.71	315.5	980.341
11	1B	14	CS-	5202.51	662.352	563.506
11	1B	15	CS+	6913.43	1701.59	873.101
11	1B	16	CS-	6793.59	1099.31	470.796
11	1B	17	CS-	5984.8	932.751	263.787
11	1B	18	CS+	5832.47	263.384	340.359
11	1B	19	CS+	6231.63	2819.8	759.063
11	1B	20	CS-	5977.11	507.794	732.585
11	1B	21	CS+	6991.03	4053.35	216.006
11	1B	22	CS+	6229.15	2348.26	431.742
11	1B	23	CS-	7397.56	1618.95	1086.25
11	1B	24	CS-	5367.01	1535.52	1249.06
11	1B	25	CS+	7738.92	5041.06	205.211
11	1B	26	CS+	7680.03	3085.85	713.28
11	1B	27	CS-	7221.74	858.478	737.717
11	1B	28	CS+	7736.87	6002.99	346.776
11	1B	29	CS-	6295.06	2120.38	400.449
11	1B	30	CS+	7740.41	2531.18	1165.22
11	1B	31	CS-	7721.06	1176.91	1424.42
11	1B	32	CS+	7805.32	2229.75	179.049
12	2A	1	CS+	5451.17	0	180.528
12	2A	2	CS-	6654.45	0	1184.55
12	2A	3	CS+	3762.21	0	590.379
12	2A	4	CS-	5372.67	0	164.57
12	2A	5	CS-	6933.42	0	520.656
12	2A	6	CS+	7858.14	0	2206.02
12	2A	7	CS+	7568.36	0	2354.76
12	2A	8	CS-	4285.79	0	849.513
12	2A	9	CS-	5784.93	0	1858.92
12	2A	10	CS+	102846	0	21332.5
12	2A	11	CS-	4012.48	0	1608.34
12	2A	12	CS-	5738.31	0	2756.27
12	2A	13	CS+	4295.26	0	445.464
12	2A	14	CS-	5220.44	0	575.238
12	2A	15	CS+	7018.93	0	0
12	2A	16	CS+	6298.76	0	0
12	2A	17	CS-	7537.44	1788.64	0
12	2A	18	CS+	6012.76	210.312	119.536
12	2A	19	CS+	6435.65	340.923	0
12	2A	20	CS-	6246.35	0	0
12	2A	21	CS+	5678.92	0	249.039
12	2A	22	CS-	6980.27	0	208.609
12	2A	23	CS+	7380.46	0	0
12	2A	24	CS-	6332.86	0	0
12	2A	25	CS-	6211.97	0	0
12	2A	26	CS+	7705.18	0	0
12	2A	27	CS+	5777.42	280.004	0
12	2A	28	CS-	7791.64	0	0
12	2A	29	CS+	7849.91	0	0
12	2A	30	CS+	6639.38	0	0
12	2A	31	CS-	5852.83	0	189.833
12	2A	32	CS-	5011.2	0	162.535
13	1A	1	CS+	7731.27	1589.08	2198.86
13	1A	2	CS-	6176.52	1465.46	1706.74
13	1A	3	CS+	1399.29	209.663	365.606
13	1A	4	CS+	6200.3	583.634	1476.57
13	1A	5	CS-	6164.76	737.868	2571.77
13	1A	6	CS-	7436.47	679.502	2311.67
13	1A	7	CS+	5508.55	2659.56	1424.5
13	1A	8	CS-	6796.59	1562.23	3282.91
13	1A	9	CS+	5930.95	1916.92	553.257
13	1A	10	CS-	6956.09	0	296.964
13	1A	11	CS+	7813.43	5347.94	187.823
13	1A	12	CS-	7227.15	2615.55	1976.91
13	1A	13	CS+	5447.16	3762.4	124.416
13	1A	14	CS+	6460.76	4364.18	201.207
13	1A	15	CS-	7652.54	3162.77	650.954
13	1A	16	CS+	7841.39	4740.65	224.847
13	1A	17	CS+	7751.62	6433.15	0
13	1A	18	CS-	7669.44	4421.13	0
13	1A	19	CS-	6312.1	476.013	292.846
13	1A	20	CS+	7641.5	2849.35	0
13	1A	21	CS-	2650.39	673.523	92.2224
13	1A	22	CS-	2095.51	907.004	48.6099
13	1A	23	CS+	6184.94	5425.98	0
13	1A	24	CS+	6450.86	5030.98	304.875
13	1A	25	CS-	1054.95	645.147	12.236
13	1A	26	CS-	5303.92	4191.44	0
13	1A	27	CS+	6734.02	6183.59	0
13	1A	28	CS-	3205.39	2160.79	0
13	1A	29	CS+	5910.84	4824.84	0
13	1A	30	CS-	6245.18	3484.6	0
13	1A	31	CS+	7018.59	5082.35	0
13	1A	32	CS-	6684.84	3678.31	353.571
14	2B	1	CS-	4860.28	295.882	1927.23
14	2B	2	CS+	7308.45	678.451	3198.25
14	2B	3	CS-	6377.81	388.265	2528.97
14	2B	4	CS+	7521.31	0	2561.5
14	2B	5	CS+	6852.86	0	147.395
14	2B	6	CS-	7763.1	0	553.594
14	2B	7	CS-	7366.92	224.24	1723.26
14	2B	8	CS+	5665.64	0	880.501
14	2B	9	CS+	7417.35	0	757.26
14	2B	10	CS-	6669.11	0	1012.31
14	2B	11	CS+	3940.28	0	1005.73
14	2B	12	CS+	6891.38	0	2814.4
14	2B	13	CS-	7362.59	0	512.324
14	2B	14	CS+	5381.85	0	5231.56
14	2B	15	CS-	7225.75	0	656.793
14	2B	16	CS-	7770.45	0	808.83
14	2B	17	CS+	7486.28	0	2113.9
14	2B	18	CS-	6763.28	0	1808.22
14	2B	19	CS-	7113.58	0	1119.6
14	2B	20	CS+	5520.77	0	5270.58
14	2B	21	CS-	6514.95	0	1692.39
14	2B	22	CS+	6171.93	0	2257.96
14	2B	23	CS-	6548.86	0	1494.27
14	2B	24	CS+	5594.68	0	5309.82
14	2B	25	CS+	7913.79	0	3706.36
14	2B	26	CS-	6755.16	0	1110.18
14	2B	27	CS-	6547.58	0	6235.1
14	2B	28	CS+	5673.68	0	1308.42
14	2B	29	CS-	6213.02	0	677.112
14	2B	30	CS-	5217.05	0	2131.34
14	2B	31	CS+	6063.45	0	3411.25
14	2B	32	CS+	5387.93	0	1850.48
15	1A	1	CS+	5706.38	408.409	0
15	1A	2	CS-	7341.76	215.712	0
15	1A	3	CS+	5539.38	0	0
15	1A	4	CS+	6597.81	0	0
15	1A	5	CS-	5689.45	0	0
15	1A	6	CS-	7573.47	0	0
15	1A	7	CS+	7097.61	0	0
15	1A	8	CS-	7939.12	77.7544	0
15	1A	9	CS+	5827.4	0	0
15	1A	10	CS-	5962.19	0	0
15	1A	11	CS+	5228.13	598.57	0
15	1A	12	CS-	6562.67	694.615	148.634
15	1A	13	CS+	6687.03	993.876	0
15	1A	14	CS+	7499.32	707.705	314.929
15	1A	15	CS-	6312.13	528.341	466.841
15	1A	16	CS+	6651.3	0	0
15	1A	17	CS+	6015.98	139.421	0
15	1A	18	CS-	5325.88	336.499	171.507
15	1A	19	CS-	7196.93	147.74	0
15	1A	20	CS+	5816.4	1310.17	0
15	1A	21	CS-	5870.11	2106.57	0
15	1A	22	CS-	5347.95	1150.05	0
15	1A	23	CS+	6545.02	1116.02	0
15	1A	24	CS+	7010.2	3156.48	0
15	1A	25	CS-	6296.35	1247.6	0
15	1A	26	CS-	7518.54	2555.03	0
15	1A	27	CS+	6474.38	2552.54	0
15	1A	28	CS-	7617.83	729.673	0
15	1A	29	CS+	7148.48	2388.17	0
15	1A	30	CS-	6312.4	2428.14	129.022
15	1A	31	CS+	7240.59	2376.91	0
15	1A	32	CS-	5296.86	1448.3	36.0884
16	1A	1	CS+	5385.46	582.442	1605.73
16	1A	2	CS-	6258.38	702.501	143.563
16	1A	3	CS+	7354.65	624.244	1302.34
16	1A	4	CS+	6137.57	510.349	1753.73
16	1A	5	CS-	5874.08	555.705	0
16	1A	6	CS-	7906.79	891.799	1245.04
16	1A	7	CS+	7295.67	397.837	278.724
16	1A	8	CS-	7233.37	961.968	942.752
16	1A	9	CS+	7373.53	776.664	518.573
16	1A	10	CS-	6188.49	820.279	0
16	1A	11	CS+	7849.52	731.435	1606.72
16	1A	12	CS-	6801.69	0	0
16	1A	13	CS+	7023.42	0	1192.66
16	1A	14	CS+	5411.85	0	267.509
16	1A	15	CS-	7615.9	0	0
16	1A	16	CS+	7363.86	0	0
16	1A	17	CS+	7483.23	0	1125
16	1A	18	CS-	5256.95	0	241.699
16	1A	19	CS-	6960.61	0	0
16	1A	20	CS+	5638.65	0	412.127
16	1A	21	CS-	5555.64	0	0
16	1A	22	CS-	7416.7	270.406	0
16	1A	23	CS+	5392.73	0	264.912
16	1A	24	CS+	7574.21	0	481.619
16	1A	25	CS-	7332.96	0	0
16	1A	26	CS-	6532.42	420.154	611.342
16	1A	27	CS+	6047.66	227.407	275.998
16	1A	28	CS-	7553.19	404.095	283.108
16	1A	29	CS+	7266.92	383.276	426.714
16	1A	30	CS-	6897.07	177.941	0
16	1A	31	CS+	7025.9	103.734	450.205
16	1A	32	CS-	6183.83	177.563	0
17	2A	1	CS+	5001.19	0	0
17	2A	2	CS-	6818.91	0	0
17	2A	3	CS+	5592.47	0	0
17	2A	4	CS-	6134.91	0	0
17	2A	5	CS-	5940.8	0	0
17	2A	6	CS+	3656.66	0	0
17	2A	7	CS+	7753.39	0	0
17	2A	8	CS-	7650.65	0	0
17	2A	9	CS-	5959.07	0	306.214
17	2A	10	CS+	6572.39	0	1311.29
17	2A	11	CS-	5485.36	0	1533.54
17	2A	12	CS-	7893.2	679.338	986.814
17	2A	13	CS+	7706.62	0	350.251
17	2A	14	CS-	7627.46	218.822	1159.32
17	2A	15	CS+	6576.87	0	440.219
17	2A	16	CS+	7791.77	0	2055.9
17	2A	17	CS-	7060.89	304.73	325.566
17	2A	18	CS+	2858.27	0	415.676
17	2A	19	CS+	7626.66	0	205.94
17	2A	20	CS-	6371.82	255.281	323.697
17	2A	21	CS+	7668.87	0	379.907
17	2A	22	CS-	5671	0	164.17
17	2A	23	CS+	5767.95	0	247.896
17	2A	24	CS-	5356.58	148.594	224.724
17	2A	25	CS-	7071.66	582.783	502.109
17	2A	26	CS+	6118.49	393.725	0
17	2A	27	CS+	6703.71	0	169.444
17	2A	28	CS-	5122.18	211.062	230.363
17	2A	29	CS+	6763.56	0	279.772
17	2A	30	CS+	2906.82	0	120.24
17	2A	31	CS-	5542.45	0	104.998
17	2A	32	CS-	5418.89	223.288	243.707
18	2B	1	CS-	6974.38	564.105	1330.06
18	2B	2	CS+	6780.3	676.471	3762.68
18	2B	3	CS-	6208.17	599.37	831.234
18	2B	4	CS+	6695.07	600.879	2695.72
18	2B	5	CS+	6609.26	146.374	4949.38
18	2B	6	CS-	5933.75	599.187	456.442
18	2B	7	CS-	7048.11	654.082	943.328
18	2B	8	CS+	7046.19	871.131	2434.18
18	2B	9	CS+	7852.19	959.96	2956.16
18	2B	10	CS-	5246.31	475.413	783.132
18	2B	11	CS+	6321.72	2046.92	251.341
18	2B	12	CS+	3434.39	749.775	473.484
18	2B	13	CS-	3132.29	402.829	892.24
18	2B	14	CS+	6841.51	771.97	1614.41
18	2B	15	CS-	6380.91	1063.01	2682.74
18	2B	16	CS-	6679.7	859.045	1902.73
18	2B	17	CS+	7886.47	1581.97	718.966
18	2B	18	CS-	3997.95	663.763	762.695
18	2B	19	CS-	7046.61	1433.61	681.341
18	2B	20	CS+	5908.33	0	3821.95
18	2B	21	CS-	5669.5	360.582	480.176
18	2B	22	CS+	6058.75	391.12	405.539
18	2B	23	CS-	7374.73	984.7	668.834
18	2B	24	CS+	7936.78	0	5958.64
18	2B	25	CS+	5493.7	361.322	1661.28
18	2B	26	CS-	6382.13	0	4753.22
18	2B	27	CS-	7633.68	452.926	1180.67
18	2B	28	CS+	6693.32	501.087	3579.5
18	2B	29	CS-	5738.61	255.69	375.432
18	2B	30	CS-	6455.38	223.547	2076.18
18	2B	31	CS+	6600.77	0	603.756
18	2B	32	CS+	7827.54	708.126	2286.92
19	1B	1	CS-	7313.45	0	1181.87
19	1B	2	CS+	6319.7	2458.35	709.799
19	1B	3	CS-	7557.16	751.342	2166.54
19	1B	4	CS-	5537.23	0	0
19	1B	5	CS+	7373.92	0	152.564
19	1B	6	CS+	6486.2	441.915	957.85
19	1B	7	CS-	6300.01	1703.34	153.086
19	1B	8	CS+	6671.17	1065.92	395.136
19	1B	9	CS-	3998.82	540.583	48.5844
19	1B	10	CS+	1414.48	113.003	41.8901
19	1B	11	CS-	6224.52	0	0
19	1B	12	CS+	5505.54	0	0
19	1B	13	CS-	6955.87	0	0
19	1B	14	CS-	7948.97	0	0
19	1B	15	CS+	7818.95	0	0
19	1B	16	CS-	7373.12	0	185.627
19	1B	17	CS-	6514.88	0	103.888
19	1B	18	CS+	7475.05	0	0
19	1B	19	CS+	7014.12	0	0
19	1B	20	CS-	7874.47	0	0
19	1B	21	CS+	6181.06	0	0
19	1B	22	CS+	4667.29	0	0
19	1B	23	CS-	2845.49	95.9335	71.5814
19	1B	24	CS-	1990.59	134.222	190.089
19	1B	25	CS+	6106.28	0	0
19	1B	26	CS+	6839.38	751.795	224.562
19	1B	27	CS-	2095.38	211.932	347.481
19	1B	28	CS+	6879.35	1108.05	596.15
19	1B	29	CS-	2959	399.04	698.825
19	1B	30	CS+	6265.85	1256.14	584.573
19	1B	31	CS-	7516.69	1267.09	2303.92
19	1B	32	CS+	5712.06	419.678	0
20	2A	1	CS+	5624.72	234.716	1002.71
20	2A	2	CS-	6288.15	0	508.831
20	2A	3	CS+	7912.62	0	397.701
20	2A	4	CS-	5635.49	0	988.621
20	2A	5	CS-	6187.09	0	0
20	2A	6	CS+	6053.76	897.818	0
20	2A	7	CS+	6710.96	1372.22	987.519
20	2A	8	CS-	5707.79	0	487.725
20	2A	9	CS-	7748.18	0	292.196
20	2A	10	CS+	7477.76	340.362	890.615
20	2A	11	CS-	4334.39	454.434	286.689
20	2A	12	CS-	7816.86	1639.1	739.271
20	2A	13	CS+	5499.4	0	1596.85
20	2A	14	CS-	5635.63	590.86	372.756
20	2A	15	CS+	6510.29	424.01	1040.46
20	2A	16	CS+	6380.93	0	542.183
20	2A	17	CS-	7285.61	435.404	3127.32
20	2A	18	CS+	6197.51	0	4300.75
20	2A	19	CS+	6996.72	0	1392.13
20	2A	20	CS-	7156.57	0	593.518
20	2A	21	CS+	6757.94	0	5939.17
20	2A	22	CS-	7276.88	694.706	201.618
20	2A	23	CS+	6979.62	0	6066.81
20	2A	24	CS-	5383.89	278.58	968.896
20	2A	25	CS-	6853.54	483.098	575.488
20	2A	26	CS+	6984.26	0	3637.34
20	2A	27	CS+	6610.31	0	4824.46
20	2A	28	CS-	6901.04	639.107	383.026
20	2A	29	CS+	6035.03	0	3834.98
20	2A	30	CS+	7180.28	0	2598.53
20	2A	31	CS-	6347.39	517.627	442.642
20	2A	32	CS-	2999.29	244.591	209.159
